# Supplementary material for: Mapping the Hsp90 Genetic Interaction Network in Candida albicans Reveals Environmental Contingency and Rewired Circuitry
Source: PLoS Genet. 2012 Mar 15;8(3):e1002562. doi: 10.1371/journal.pgen.1002562 (PMC3305360; doi:10.1371/journal.pgen.1002562)
Supplement: Table S1 — Hsp90 genetic interactors. (XLS) [file pgen.1002562.s006.xls]

## Sheet: supplement.screen-500.txt
Name	ORF	Id	Systematic	Ortholog	T41	T37	T	C	FL	NaCl	Total	GO.Name
HOS2	orf19.12832	HOS2	CAL0004384	HOS2	1	1	1	1	1	1	6	histone deacetylase complex	histone deacetylase activity	chromatin organization	protein modification process	protein amino acid deacetylation	pathogenesis	regulation of biosynthetic process	regulation of signal transduction	positive regulation of signal transduction	regulation of gene expression	regulation of macromolecule biosynthetic process	regulation of cell cycle process	regulation of filamentous growth	regulation of intracellular protein kinase cascade	regulation of cell communication	positive regulation of cell communication	positive regulation of intracellular protein kinase cascade	negative regulation of cell cycle process	chromatin modification	covalent chromatin modification	histone modification	histone deacetylation	chromatin remodeling complex	hydrolase activity	hydrolase activity, acting on carbon-nitrogen (but not peptide) bonds	hydrolase activity, acting on carbon-nitrogen (but not peptide) bonds, in linear amides	NAD-dependent histone deacetylase activity	deacetylase activity	regulation of nucleobase, nucleoside, nucleotide and nucleic acid metabolic process	regulation of signaling process	positive regulation of signaling process	filamentous growth	regulation of cellular biosynthetic process	developmental process	regulation of stress-activated MAPK cascade	positive regulation of stress-activated MAPK cascade	protein deacetylase activity	Set3 complex
CKB1	orf19.2102	CKB1	CAL0005264	CKB1	1	1	1	0	1	1	5	enzyme inhibitor activity	protein kinase inhibitor activity	protein kinase CK2 complex	regulation of transcription, DNA-dependent	regulation of transcription from RNA polymerase I promoter	regulation of transcription from RNA polymerase III promoter	protein modification process	protein amino acid phosphorylation	phosphorus metabolic process	phosphate metabolic process	response to stress	response to DNA damage stimulus	regulation of biosynthetic process	regulation of gene expression	regulation of macromolecule biosynthetic process	phosphorylation	kinase regulator activity	kinase inhibitor activity	regulation of nucleobase, nucleoside, nucleotide and nucleic acid metabolic process	protein kinase regulator activity	enzyme regulator activity	protein serine/threonine kinase inhibitor activity	regulation of cellular biosynthetic process	cellular response to stress	UTP-C complex	response to chemical stimulus	response to drug	macromolecule modification	post-translational protein modification	nucleolar part	regulation of transcription	regulation of nitrogen compound metabolic process	regulation of RNA metabolic process	cellular response to stimulus	regulation of macromolecule metabolic process	regulation of primary metabolic process
AHR1	orf19.7381	AHR1	CAL0004794	LYS14	1	1	1	0	1	1	5	filamentous growth	growth	response to chemical stimulus	response to drug
CKB2	orf19.4297	CKB2	CAL0000389	CKB2	0	1	1	1	1	1	5	enzyme inhibitor activity	protein kinase inhibitor activity	protein kinase CK2 complex	regulation of transcription, DNA-dependent	regulation of transcription from RNA polymerase I promoter	regulation of transcription from RNA polymerase III promoter	protein modification process	protein amino acid phosphorylation	phosphorus metabolic process	phosphate metabolic process	response to stress	response to DNA damage stimulus	regulation of biosynthetic process	regulation of gene expression	regulation of macromolecule biosynthetic process	phosphorylation	kinase regulator activity	kinase inhibitor activity	regulation of nucleobase, nucleoside, nucleotide and nucleic acid metabolic process	protein kinase regulator activity	enzyme regulator activity	protein serine/threonine kinase inhibitor activity	regulation of cellular biosynthetic process	CURI complex	cellular response to stress	UTP-C complex	response to chemical stimulus	response to drug	macromolecule modification	post-translational protein modification	nucleolar part	regulation of transcription	regulation of nitrogen compound metabolic process	regulation of RNA metabolic process	cellular response to stimulus	regulation of macromolecule metabolic process	regulation of primary metabolic process
HOF1	orf19.5664	HOF1	CAL0000692	NA	1	1	0	1	1	0	4
FCR3	orf19.3193	FCR3	CAL0002445	YAP3	1	1	1	1	0	0	4	nucleic acid binding	DNA binding	transcription factor activity	regulation of transcription, DNA-dependent	regulation of transcription from RNA polymerase II promoter	regulation of biosynthetic process	regulation of gene expression	regulation of macromolecule biosynthetic process	regulation of nucleobase, nucleoside, nucleotide and nucleic acid metabolic process	transcription regulator activity	regulation of cellular biosynthetic process	response to chemical stimulus	response to drug	regulation of transcription	regulation of nitrogen compound metabolic process	regulation of RNA metabolic process	regulation of macromolecule metabolic process	regulation of primary metabolic process
NA	orf19.223	orf19.223	CAL0003919	FPK1	1	1	1	0	0	1	4	protein kinase activity	protein serine/threonine kinase activity	plasma membrane	protein modification process	protein amino acid phosphorylation	phosphorus metabolic process	phosphate metabolic process	response to organic substance	kinase activity	phosphorylation	transferase activity	transferase activity, transferring phosphorus-containing groups	phosphotransferase activity, alcohol group as acceptor	response to pheromone	regulation of lipid transport	positive regulation of lipid transport	regulation of localization	response to chemical stimulus	macromolecule modification	post-translational protein modification	protein amino acid autophosphorylation	positive regulation of biological process	positive regulation of cellular process	regulation of transport	positive regulation of transport	regulation of cellular component organization	positive regulation of cellular component organization	regulation of phospholipid translocation	positive regulation of phospholipid translocation
LRG1	orf19.7489	LRG1	CAL0005717	LRG1	0	1	1	0	1	1	4	small GTPase regulator activity	GTPase activator activity	Ras GTPase activator activity	Rho GTPase activator activity	mitochondrion	cellular bud neck	signal transduction	small GTPase mediated signal transduction	enzyme activator activity	fungal-type cell wall biogenesis	signaling pathway	intracellular signaling pathway	signaling process	signaling	signal transmission	enzyme regulator activity	site of polarized growth	GTPase regulator activity	intracellular signal transduction	cell wall biogenesis	cellular component biogenesis	nucleoside-triphosphatase regulator activity	cellular cell wall organization or biogenesis	cell wall organization or biogenesis
NA	orf19.12893	orf19.12893	CAL0005238	SLX8	1	1	0	0	1	0	3
MSN4	orf19.12215	MSN4	CAL0004476	MSN4	1	1	1	0	0	0	3	nucleic acid binding	DNA binding	transcription factor activity	regulation of transcription, DNA-dependent	regulation of biosynthetic process	regulation of gene expression	regulation of macromolecule biosynthetic process	regulation of nucleobase, nucleoside, nucleotide and nucleic acid metabolic process	transcription regulator activity	regulation of cellular biosynthetic process	regulation of transcription	regulation of nitrogen compound metabolic process	regulation of RNA metabolic process	regulation of macromolecule metabolic process	regulation of primary metabolic process
GIN1	orf19.658	GIN1	CAL0001036	MRC1	1	1	1	0	0	0	3	cell cycle checkpoint	DNA replication checkpoint	DNA damage checkpoint	telomere maintenance	DNA metabolic process	regulation of DNA replication	DNA repair	chromatin silencing	chromatin silencing at telomere	regulation of transcription, DNA-dependent	response to stress	response to DNA damage stimulus	sister chromatid cohesion	mitotic sister chromatid cohesion	signal transduction	negative regulation of DNA replication	regulation of biosynthetic process	negative regulation of biosynthetic process	negative regulation of metabolic process	regulation of gene expression	regulation of macromolecule biosynthetic process	negative regulation of macromolecule biosynthetic process	negative regulation of macromolecule metabolic process	negative regulation of gene expression	gene silencing	negative regulation of transcription	regulation of nucleobase, nucleoside, nucleotide and nucleic acid metabolic process	cell cycle process	signaling pathway	intracellular signaling pathway	signaling process	signaling	signal transmission	regulation of DNA-dependent DNA replication initiation	filamentous growth	hyphal growth	chromatin silencing at silent mating-type cassette	replication fork protection complex
NA	orf19.10999	orf19.10999	CAL0005774	SLM2	1	1	0	0	0	1	3	regulation of cell growth	plasma membrane	cytoskeleton organization	actin filament organization	establishment or maintenance of cell polarity	signal transduction	cellular component assembly	signaling pathway	intracellular signaling pathway	signaling process	signaling	signal transmission	actin filament-based process	actin cytoskeleton organization	establishment or maintenance of actin cytoskeleton polarity	establishment or maintenance of cytoskeleton polarity	TOR signaling cascade	intracellular signal transduction	regulation of growth	actin filament bundle assembly	regulation of cellular component organization
CKA1	orf19.7652	CKA1	CAL0000912	CKA1	1	1	0	0	0	1	3	protein kinase activity	protein serine/threonine kinase activity	protein kinase CK2 complex	regulation of transcription, DNA-dependent	regulation of transcription from RNA polymerase I promoter	regulation of transcription from RNA polymerase III promoter	protein modification process	protein amino acid phosphorylation	phosphorus metabolic process	phosphate metabolic process	response to stress	response to DNA damage stimulus	regulation of biosynthetic process	regulation of gene expression	regulation of macromolecule biosynthetic process	kinase activity	phosphorylation	transferase activity	transferase activity, transferring phosphorus-containing groups	phosphotransferase activity, alcohol group as acceptor	regulation of nucleobase, nucleoside, nucleotide and nucleic acid metabolic process	regulation of cellular biosynthetic process	cellular response to stress	UTP-C complex	macromolecule modification	post-translational protein modification	nucleolar part	regulation of transcription	regulation of nitrogen compound metabolic process	regulation of RNA metabolic process	cellular response to stimulus	regulation of macromolecule metabolic process	regulation of primary metabolic process
OCA1	orf19.9331	OCA1	CAL0000898	OCA1	0	1	1	0	0	1	3	phosphoprotein phosphatase activity	protein tyrosine phosphatase activity	protein modification process	protein amino acid dephosphorylation	phosphorus metabolic process	phosphate metabolic process	dephosphorylation	hydrolase activity	hydrolase activity, acting on ester bonds	phosphatase activity	phosphoric ester hydrolase activity	macromolecule modification	post-translational protein modification
IRE1	orf19.5068	IRE1	CAL0001725	IRE1	0	1	1	0	0	1	3	nuclease activity	endonuclease activity	endoribonuclease activity	ribonuclease activity	protein kinase activity	protein serine/threonine kinase activity	protein binding	carbohydrate metabolic process	inositol metabolic process	alcohol metabolic process	protein modification process	protein amino acid phosphorylation	phosphorus metabolic process	phosphate metabolic process	response to stress	ER-nucleus signaling pathway	response to unfolded protein	cellular cell wall organization	response to biotic stimulus	response to organic substance	kinase activity	phosphorylation	transferase activity	transferase activity, transferring phosphorus-containing groups	phosphotransferase activity, alcohol group as acceptor	hydrolase activity	hydrolase activity, acting on ester bonds	polyol metabolic process	signaling pathway	intracellular signaling pathway	signaling	endoplasmic reticulum unfolded protein response	fungal-type cell wall organization	cellular response to stress	cellular response to unfolded protein	response to endoplasmic reticulum stress	response to chemical stimulus	response to drug
NA	orf19.1141	orf19.1141	CAL0002911	NA	1	1	0	0	0	0	2	nucleic acid binding	DNA binding	transcription factor activity	regulation of transcription, DNA-dependent	regulation of biosynthetic process	regulation of gene expression	regulation of macromolecule biosynthetic process	regulation of nucleobase, nucleoside, nucleotide and nucleic acid metabolic process	transcription regulator activity	regulation of cellular biosynthetic process	regulation of transcription	regulation of nitrogen compound metabolic process	regulation of RNA metabolic process	regulation of macromolecule metabolic process	regulation of primary metabolic process
HAL9	orf19.3190	HAL9	CAL0002440	HAL9	1	1	0	0	0	0	2	nucleic acid binding	DNA binding	RNA polymerase II transcription factor activity	specific RNA polymerase II transcription factor activity	mitochondrion	transcription initiation	transcription initiation from RNA polymerase II promoter	protein complex assembly	response to stress	response to osmotic stress	response to abiotic stimulus	response to salt stress	cellular component assembly	transcription regulator activity	sequence-specific DNA binding	macromolecular complex subunit organization	macromolecular complex assembly
EMC9	orf19.1907	EMC9	CAL0002503	NNF2	1	1	0	0	0	0	2	cell fraction	membrane fraction	insoluble fraction
ZCF2	orf19.431	ZCF2	CAL0005650	PUT3	1	1	0	0	0	0	2	nucleic acid binding	DNA binding	transcription factor activity	regulation of transcription, DNA-dependent	regulation of biosynthetic process	regulation of gene expression	regulation of macromolecule biosynthetic process	regulation of nucleobase, nucleoside, nucleotide and nucleic acid metabolic process	transcription regulator activity	regulation of cellular biosynthetic process	regulation of transcription	regulation of nitrogen compound metabolic process	regulation of RNA metabolic process	regulation of macromolecule metabolic process	regulation of primary metabolic process
SLA2	orf19.7201	SLA2	CAL0003735	SLA2	1	1	0	0	0	0	2	G2/M transition of mitotic cell cycle	protein binding	endocytosis	cytoskeleton organization	actin filament organization	membrane invagination	cellular membrane organization	vesicle-mediated transport	cell cycle process	actin filament-based process	actin cytoskeleton organization	filamentous growth	hyphal growth	actin cortical patch	protein binding, bridging	growth	cytoskeletal part	cell cortex part	localization	cellular localization	actin cortical patch localization	membrane organization
NA	orf19.4243	orf19.4243	CAL0000220	CUE2	1	1	0	0	0	0	2	protein binding	small conjugating protein binding	ubiquitin binding
UPC2	orf19.391	UPC2	CAL0004944	UPC2	1	1	0	0	0	0	2	nucleic acid binding	DNA binding	transcription factor activity	RNA polymerase II transcription factor activity	alcohol metabolic process	regulation of transcription, DNA-dependent	regulation of transcription from RNA polymerase II promoter	lipid metabolic process	steroid biosynthetic process	steroid metabolic process	ergosterol metabolic process	lipid biosynthetic process	regulation of biosynthetic process	negative regulation of biosynthetic process	positive regulation of biosynthetic process	negative regulation of metabolic process	positive regulation of metabolic process	regulation of gene expression	regulation of macromolecule biosynthetic process	positive regulation of macromolecule biosynthetic process	negative regulation of macromolecule biosynthetic process	positive regulation of macromolecule metabolic process	negative regulation of macromolecule metabolic process	positive regulation of gene expression	negative regulation of gene expression	integral to membrane	sterol metabolic process	sterol biosynthetic process	phytosteroid metabolic process	negative regulation of transcription	transcription repressor activity	regulation of nucleobase, nucleoside, nucleotide and nucleic acid metabolic process	transcription regulator activity	intrinsic to membrane	negative regulation of cellular metabolic process	positive regulation of cellular metabolic process	regulation of cellular biosynthetic process	negative regulation of cellular biosynthetic process
APL5	orf19.248	APL5	CAL0003993	APL5	1	1	0	0	0	0	2	post-Golgi vesicle-mediated transport	Golgi to vacuole transport	vacuolar transport	vesicle-mediated transport	intracellular transport	Golgi vesicle transport	establishment of localization in cell
NA	orf19.4139	orf19.4139	CAL0005675	YBL053	1	1	0	0	0	0	2	cell cycle checkpoint	DNA replication checkpoint	DNA metabolic process	regulation of DNA replication	DNA repair	response to stress	response to DNA damage stimulus	sister chromatid cohesion	mitotic sister chromatid cohesion	signal transduction	negative regulation of DNA replication	regulation of biosynthetic process	negative regulation of biosynthetic process	negative regulation of metabolic process	regulation of macromolecule biosynthetic process	negative regulation of macromolecule biosynthetic process	negative regulation of macromolecule metabolic process	regulation of nucleobase, nucleoside, nucleotide and nucleic acid metabolic process	cell cycle process	signaling process	signal transmission	regulation of DNA-dependent DNA replication initiation	replication fork protection complex	negative regulation of cellular metabolic process	regulation of cellular biosynthetic process	negative regulation of cellular biosynthetic process	DNA integrity checkpoint	negative regulation of DNA-dependent DNA replication initiation	cellular response to stress	replication fork arrest	maintenance of DNA repeat elements	chromosomal part	nuclear chromosome part	maintenance of fidelity involved in DNA-dependent DNA replication	negative regulation of nucleobase, nucleoside, nucleotide and nucleic acid metabolic process	replication fork protection	negative regulation of biological process	negative regulation of cellular process
PUF3	orf19.1795	PUF3	CAL0000998	PUF3	1	1	0	0	0	0	2
NA	orf19.467	orf19.467	CAL0005769	NA	1	1	0	0	0	0	2
MDM34	orf19.1826	MDM34	CAL0001630	NA	1	1	0	0	0	0	2	nucleic acid binding	DNA binding	transcription factor activity	regulation of transcription, DNA-dependent	regulation of biosynthetic process	regulation of gene expression	regulation of macromolecule biosynthetic process	regulation of nucleobase, nucleoside, nucleotide and nucleic acid metabolic process	transcription regulator activity	regulation of cellular biosynthetic process	regulation of transcription	regulation of nitrogen compound metabolic process	regulation of RNA metabolic process	regulation of macromolecule metabolic process	regulation of primary metabolic process
FGR15	orf19.2054	FGR15	CAL0004440	RPN4	0	1	0	0	1	0	2	nucleic acid binding	DNA binding	transcription factor activity	regulation of transcription, DNA-dependent	regulation of biosynthetic process	regulation of gene expression	regulation of macromolecule biosynthetic process	regulation of nucleobase, nucleoside, nucleotide and nucleic acid metabolic process	filamentous growth	transcription regulator activity	regulation of cellular biosynthetic process	growth	regulation of transcription	regulation of nitrogen compound metabolic process	regulation of RNA metabolic process	regulation of macromolecule metabolic process	regulation of primary metabolic process
MIG1	orf19.4318	MIG1	CAL0000926	MIG1	0	1	0	0	1	0	2	nucleic acid binding	DNA binding	double-stranded DNA binding	transcription factor activity	regulation of transcription, DNA-dependent	regulation of transcription from RNA polymerase II promoter	regulation of biosynthetic process	negative regulation of biosynthetic process	negative regulation of metabolic process	regulation of gene expression	regulation of macromolecule biosynthetic process	negative regulation of macromolecule biosynthetic process	negative regulation of macromolecule metabolic process	negative regulation of gene expression	carbon utilization	negative regulation of transcription	transcription repressor activity	regulation of nucleobase, nucleoside, nucleotide and nucleic acid metabolic process	transcription regulator activity	negative regulation of cellular metabolic process	regulation of cellular biosynthetic process	negative regulation of cellular biosynthetic process	response to chemical stimulus	response to drug	structure-specific DNA binding	regulation of transcription	negative regulation of nucleobase, nucleoside, nucleotide and nucleic acid metabolic process	negative regulation of biological process	negative regulation of cellular process	regulation of nitrogen compound metabolic process	negative regulation of nitrogen compound metabolic process	regulation of RNA metabolic process	regulation of macromolecule metabolic process	regulation of primary metabolic process
MIG2	orf19.12786	MIG2	CAL0004281	MIG2	0	1	0	0	1	0	2	nucleic acid binding	DNA binding	transcription factor activity	regulation of transcription, DNA-dependent	regulation of biosynthetic process	regulation of gene expression	regulation of macromolecule biosynthetic process	regulation of nucleobase, nucleoside, nucleotide and nucleic acid metabolic process	transcription regulator activity	regulation of cellular biosynthetic process	response to chemical stimulus	response to drug	regulation of transcription	regulation of nitrogen compound metabolic process	regulation of RNA metabolic process	regulation of macromolecule metabolic process	regulation of primary metabolic process
ROD1	orf19.1509	ROD1	CAL0005393	ROG3	0	1	1	0	0	0	2	protein binding	enzyme binding	ubiquitin protein ligase binding
DIE2	orf19.6971	DIE2	CAL0000363	DIE2	0	1	1	0	0	0	2	dolichyl-phosphate-glucose-glycolipid alpha-glucosyltransferase activity	endoplasmic reticulum membrane	carbohydrate metabolic process	protein modification process	protein amino acid glycosylation	protein amino acid N-linked glycosylation	transferase activity	transferase activity, transferring glycosyl groups	transferase activity, transferring hexosyl groups	organelle membrane	macromolecule modification	macromolecule glycosylation	cellular carbohydrate metabolic process	membrane part	endoplasmic reticulum part	glucosyltransferase activity	glycosylation
HST7	orf19.469	HST7	CAL0005777	STE7	0	1	1	0	0	0	2	reproduction	MAPKKK cascade	conjugation	conjugation with cellular fusion	protein kinase activity	MAP kinase kinase activity	protein serine/threonine/tyrosine kinase activity	protein modification process	protein amino acid phosphorylation	phosphorus metabolic process	phosphate metabolic process	cellular cell wall organization	signal transduction	intracellular protein kinase cascade	kinase activity	phosphorylation	transferase activity	transferase activity, transferring phosphorus-containing groups	phosphotransferase activity, alcohol group as acceptor	sexual reproduction	signal transmission via phosphorylation event	signaling pathway	intracellular signaling pathway	signaling process	signaling	signal transmission	filamentous growth	hyphal growth	fungal-type cell wall organization	intracellular signal transduction	growth	response to chemical stimulus	response to drug	macromolecule modification	post-translational protein modification	external encapsulating structure organization	multi-organism process	cellular cell wall organization or biogenesis
AAT22	orf19.4669	AAT22	CAL0003762	AAT2	0	1	0	1	0	0	2
GZF3	19.2842	GZF3	CAL0005136	GZF3	0	1	0	1	0	0	2	response to stress	response to temperature stimulus	response to heat	response to abiotic stimulus	response to inorganic substance	response to metal ion	response to lithium ion	filamentous growth	cellular response to stress	cellular response to heat	growth	response to chemical stimulus	response to drug	response to copper ion	cellular response to stimulus
RTG1	orf19.12185	RTG1	CAL0004395	RTGT1	0	1	0	1	0	0	2
PTP1	orf19.6365	PTP1	CAL0001363	PTP1	0	1	0	1	0	0	2	phosphoprotein phosphatase activity	protein tyrosine phosphatase activity	mitochondrion	protein modification process	protein amino acid dephosphorylation	phosphorus metabolic process	phosphate metabolic process	dephosphorylation	hydrolase activity	hydrolase activity, acting on ester bonds	phosphatase activity	phosphoric ester hydrolase activity	macromolecule modification	post-translational protein modification
NA	orf19.1276	orf19.1276	CAL0003021	NA	0	1	0	1	0	0	2
BMH1	orf19.3014	BMH1	CAL0001346	BMH2	0	1	0	1	0	0	2	reproduction	cell cycle checkpoint	DNA damage checkpoint	cell fraction	polysaccharide biosynthetic process	signal transduction involved in filamentous growth	chlamydospore formation	plasma membrane enriched fraction	reproductive developmental process	nucleic acid binding	DNA binding	DNA replication origin binding	cell wall	plasma membrane	carbohydrate metabolic process	polysaccharide metabolic process	glycogen metabolic process	monosaccharide metabolic process	glucose metabolic process	aminoglycan metabolic process	aminoglycan biosynthetic process	chitin metabolic process	chitin biosynthetic process	cell wall chitin metabolic process	cell wall chitin biosynthetic process	alcohol metabolic process	cellular glucan metabolic process	generation of precursor metabolites and energy	regulation of carbohydrate metabolic process	energy reserve metabolic process	DNA metabolic process	pre-replicative complex assembly	DNA-dependent DNA replication initiation	response to stress	response to DNA damage stimulus	pseudohyphal growth	signal transduction	small GTPase mediated signal transduction
NA	orf19.9115	orf19.9115	CAL0005499	NA	0	1	0	1	0	0	2
LYS143	orf19.4776	LYS143	CAL0004554	LYS14	0	1	0	0	0	1	2	nucleic acid binding	DNA binding	transcription factor activity	organic acid metabolic process	regulation of transcription, DNA-dependent	cellular amino acid and derivative metabolic process	cellular amino acid metabolic process	lysine metabolic process	cellular amino acid biosynthetic process	aspartate family amino acid metabolic process	aspartate family amino acid biosynthetic process	lysine biosynthetic process	amine metabolic process	amine biosynthetic process	regulation of biosynthetic process	regulation of gene expression	regulation of macromolecule biosynthetic process	organic acid biosynthetic process	transcription activator activity	regulation of nucleobase, nucleoside, nucleotide and nucleic acid metabolic process	carboxylic acid metabolic process	lysine biosynthetic process via aminoadipic acid	transcription regulator activity	regulation of cellular biosynthetic process	cellular ketone metabolic process	oxoacid metabolic process	sequence-specific DNA binding	cellular amine metabolic process	cellular nitrogen compound biosynthetic process	small molecule biosynthetic process	regulation of transcription	carboxylic acid biosynthetic process	regulation of nitrogen compound metabolic process	regulation of RNA metabolic process	regulation of macromolecule metabolic process	regulation of primary metabolic process
ARO80	orf19.10530	ARO80	CAL0001342	ARO80	0	1	0	0	0	1	2	nucleic acid binding	DNA binding	RNA polymerase II transcription factor activity	specific RNA polymerase II transcription factor activity	organic acid metabolic process	regulation of transcription, DNA-dependent	regulation of transcription from RNA polymerase II promoter	cellular amino acid and derivative metabolic process	cellular amino acid metabolic process	cellular aromatic compound metabolic process	catabolic process	cellular amino acid catabolic process	aromatic amino acid family metabolic process	aromatic amino acid family catabolic process	amine metabolic process	amine catabolic process	regulation of biosynthetic process	positive regulation of biosynthetic process	positive regulation of metabolic process	regulation of gene expression	regulation of macromolecule biosynthetic process	positive regulation of macromolecule biosynthetic process	positive regulation of macromolecule metabolic process	positive regulation of gene expression	organic acid catabolic process	regulation of nucleobase, nucleoside, nucleotide and nucleic acid metabolic process	aromatic compound catabolic process	carboxylic acid metabolic process	transcription regulator activity	positive regulation of cellular metabolic process	regulation of cellular biosynthetic process	positive regulation of cellular biosynthetic process	cellular ketone metabolic process	oxoacid metabolic process	sequence-specific DNA binding	cellular amine metabolic process	cellular catabolic process	small molecule catabolic process
NA	orf19.5412	orf19.5412	CAL0005181	ECM9	1	0	0	0	1	0	2	cellular cell wall organization	fungal-type cell wall organization	external encapsulating structure organization	cellular cell wall organization or biogenesis	cell wall organization or biogenesis	cell wall organization
NA	orf19.3751	orf19.3751	CAL0001213	KIN4	1	0	1	0	0	0	2	cell cycle checkpoint	microtubule organizing center	spindle pole body	cellular bud neck	cell cortex	mitotic cell cycle checkpoint	signal transduction	regulation of mitotic cell cycle	signaling process	signal transmission	site of polarized growth	spindle checkpoint	mitotic cell cycle spindle orientation checkpoint	cytoskeletal part	regulation of cell cycle	mitotic cell cycle spindle checkpoint
YCK2	orf19.7001	YCK2	CAL0001885	YCK2	1	0	1	0	0	0	2	cell fraction	cell morphogenesis	cytokinesis	plasma membrane enriched fraction	protein kinase activity	protein serine/threonine kinase activity	plasma membrane	cellular bud neck	mating projection	protein modification process	protein amino acid phosphorylation	phosphorus metabolic process	phosphate metabolic process	endocytosis	response to stress	anatomical structure morphogenesis	response to carbohydrate stimulus	response to hexose stimulus	response to glucose stimulus	response to organic substance	membrane invagination	cellular membrane organization	vesicle-mediated transport	kinase activity	phosphorylation	transferase activity	transferase activity, transferring phosphorus-containing groups	phosphotransferase activity, alcohol group as acceptor	site of polarized growth	filamentous growth	hyphal growth	developmental process	cellular component morphogenesis	cellular response to stress	response to monosaccharide stimulus	growth	response to chemical stimulus	response to drug
CDC10	orf19.548	CDC10	CAL0000214	CDC10	1	0	1	0	0	0	2	reproduction	incipient cellular bud site	cellular bud neck septin ring	nucleotide binding	cellular bud neck septin structure	cytokinesis	septin ring assembly	mating projection base	chlamydospore formation	hyphal tip	GTPase activity	phospholipid binding	phosphatidylinositol binding	cytoskeleton	cellular bud neck	cell cortex	septin ring	chitin localization	protein complex assembly	cellular cell wall organization	protein localization	asymmetric protein localization	lipid binding	pathogenesis	pyrophosphatase activity	hydrolase activity	hydrolase activity, acting on acid anhydrides	hydrolase activity, acting on acid anhydrides, in phosphorus-containing anhydrides	nucleoside-triphosphatase activity	asexual reproduction	cellular component assembly	biological adhesion	cell differentiation	site of polarized growth	cell septum	sporulation resulting in formation of a cellular spore	asexual sporulation	filamentous growth
RIM15	orf19.7044	RIM15	CAL0002056	RIM15	1	0	1	0	0	0	2	age-dependent response to oxidative stress	age-dependent general metabolic decline involved in chronological cell aging	age-dependent response to oxidative stress involved in chronological cell aging	protein kinase activity	protein modification process	protein amino acid phosphorylation	phosphorus metabolic process	phosphate metabolic process	response to stress	response to oxidative stress	age-dependent general metabolic decline	regulation of cell cycle process	kinase activity	phosphorylation	transferase activity	transferase activity, transferring phosphorus-containing groups	phosphotransferase activity, alcohol group as acceptor	developmental process	regulation of meiosis	response to chemical stimulus	macromolecule modification	post-translational protein modification	regulation of meiotic cell cycle	regulation of cell cycle
ZCF13	orf19.10169	ZCF13	CAL0003461	VRP1	1	0	0	1	0	0	2
PPR1	orf19.3986	PPR1	CAL0003140	PPR1	1	0	0	1	0	0	2	nucleic acid binding	DNA binding	transcription factor activity	regulation of transcription, DNA-dependent	regulation of biosynthetic process	regulation of gene expression	regulation of macromolecule biosynthetic process	regulation of nucleobase, nucleoside, nucleotide and nucleic acid metabolic process	transcription regulator activity	regulation of cellular biosynthetic process	regulation of transcription	regulation of nitrogen compound metabolic process	regulation of RNA metabolic process	regulation of macromolecule metabolic process	regulation of primary metabolic process
ARG81	orf19.4766	ARG81	CAL0004520	ARG81	1	0	0	0	0	1	2	nucleic acid binding	DNA binding	transcription factor activity	transcription cofactor activity	protein binding	regulation of transcription, DNA-dependent	transcription factor binding	regulation of biosynthetic process	regulation of gene expression	regulation of macromolecule biosynthetic process	regulation of exocytosis	regulation of calcium ion-dependent exocytosis	regulation of nucleobase, nucleoside, nucleotide and nucleic acid metabolic process	nitrogen utilization	transcription regulator activity	regulation of cellular biosynthetic process	regulation of localization	response to chemical stimulus	response to drug	regulation of transcription	negative regulation of exocytosis	negative regulation of calcium ion-dependent exocytosis	negative regulation of biological process	negative regulation of cellular process	regulation of secretion	negative regulation of secretion	regulation of transport	negative regulation of transport	regulation of nitrogen compound metabolic process	regulation of RNA metabolic process	regulation of macromolecule metabolic process	regulation of cellular localization	regulation of vesicle-mediated transport	regulation of primary metabolic process
ZCF29	orf19.12598	ZCF29	CAL0002550	HAP1	0	0	1	0	1	0	2	response to stress	response to oxidative stress	response to chemical stimulus	response to drug
SSN8	orf19.7355	SSN8	CAL0004675	SSN8	0	0	1	0	1	0	2	cellular cell wall organization	meiosis	cell cycle process	cell cycle phase	fungal-type cell wall organization	external encapsulating structure organization	cellular cell wall organization or biogenesis	cell wall organization or biogenesis	cell wall organization
SNT1	orf19.12706	SNT1	CAL0003554	SNT1	0	0	1	0	1	0	2	filamentous growth	growth
DOA4	orf19.7207	DOA4	CAL0003741	DOA4	0	0	1	0	1	0	2	cell fraction	proteasome complex	endopeptidase activity	ubiquitin thiolesterase activity	ubiquitin-specific protease activity	membrane fraction	insoluble fraction	mitochondrion	endosome	regulation of DNA replication	proteolysis	ubiquitin-dependent protein catabolic process	endocytosis	peptidase activity	cysteine-type peptidase activity	catabolic process	macromolecule catabolic process	regulation of biosynthetic process	response to inorganic substance	response to metal ion	response to lithium ion	membrane invagination	regulation of macromolecule biosynthetic process	ubiquitin homeostasis	free ubiquitin chain depolymerization	cellular membrane organization	vesicle-mediated transport	hydrolase activity	hydrolase activity, acting on ester bonds	thiolester hydrolase activity	regulation of nucleobase, nucleoside, nucleotide and nucleic acid metabolic process	cellular homeostasis	small conjugating protein-specific protease activity	modification-dependent protein catabolic process	cellular component disassembly	regulation of cellular biosynthetic process	macromolecular complex disassembly	cellular macromolecular complex subunit organization
WSC1	orf19.5867	WSC1	CAL0002412	SLG1	0	0	0	1	1	0	2	cell wall	fungal-type cell wall	external encapsulating structure
CPH1	orf19.4433	CPH1	CAL0001810	STE12	0	0	0	1	1	0	2	reproduction	conjugation	conjugation with cellular fusion	nucleic acid binding	DNA binding	transcription factor activity	carbohydrate metabolic process	monosaccharide metabolic process	galactose metabolic process	alcohol metabolic process	regulation of transcription, DNA-dependent	regulation of transcription from RNA polymerase II promoter	response to stress	defense response	cellular cell wall organization	pseudohyphal growth	signal transduction	positive regulation of transcription from RNA polymerase II promoter by pheromones	positive regulation of transcription by pheromones	regulation of transcription by pheromones	pathogenesis	response to biotic stimulus	regulation of biosynthetic process	positive regulation of biosynthetic process	positive regulation of metabolic process	response to organic substance	regulation of gene expression	regulation of gene-specific transcription from RNA polymerase II promoter	positive regulation of gene-specific transcription from RNA polymerase II promoter	regulation of macromolecule biosynthetic process	positive regulation of macromolecule biosynthetic process	positive regulation of macromolecule metabolic process	positive regulation of gene expression	cell growth	regulation of nucleobase, nucleoside, nucleotide and nucleic acid metabolic process	response to pheromone	hexose metabolic process	sexual reproduction
STB5	orf19.3308	STB5	CAL0004052	STB5	0	0	0	1	1	0	2	nucleic acid binding	DNA binding	transcription factor activity	transcription	regulation of transcription, DNA-dependent	regulation of transcription from RNA polymerase II promoter	response to stress	response to oxidative stress	macromolecule biosynthetic process	response to xenobiotic stimulus	regulation of biosynthetic process	regulation of gene expression	regulation of macromolecule biosynthetic process	regulation of nucleobase, nucleoside, nucleotide and nucleic acid metabolic process	transcription regulator activity	regulation of cellular biosynthetic process	cellular response to stress	cellular response to oxidative stress	cellular macromolecule biosynthetic process	response to chemical stimulus	sequence-specific DNA binding	regulation of transcription from RNA polymerase II promoter in response to stress	regulation of transcription from RNA polymerase II promoter in response to oxidative stress	regulation of transcription in response to stress	regulation of transcription	regulation of nitrogen compound metabolic process	regulation of RNA metabolic process	cellular response to stimulus	regulation of macromolecule metabolic process	cellular response to chemical stimulus	regulation of primary metabolic process
GZF3	orf19.2842	GZF3	CAL0005136	GZF3	0	0	0	0	1	1	2	response to stress	response to temperature stimulus	response to heat	response to abiotic stimulus	response to inorganic substance	response to metal ion	response to lithium ion	filamentous growth	cellular response to stress	cellular response to heat	growth	response to chemical stimulus	response to drug	response to copper ion	cellular response to stimulus
ADA2	orf19.2331	ADA2	CAL0000716	ADA2	0	0	0	0	1	1	2	histone acetyltransferase complex	SAGA complex	chromatin silencing at rDNA	phosphatidylserine binding	nucleic acid binding	DNA binding	chromatin binding	transcription factor activity	transcription cofactor activity	transcription coactivator activity	protein binding	phospholipid binding	Ada2/Gcn5/Ada3 transcription activator complex	chromatin organization	chromatin silencing	chromatin silencing at telomere	regulation of transcription, DNA-dependent	regulation of transcription from RNA polymerase II promoter	protein modification process	protein amino acid acetylation	cellular cell wall organization	transcription factor binding	lipid binding	pathogenesis	regulation of biosynthetic process	negative regulation of biosynthetic process	negative regulation of metabolic process	positive regulation of metabolic process	regulation of gene expression	regulation of macromolecule biosynthetic process	negative regulation of macromolecule biosynthetic process	positive regulation of macromolecule metabolic process	negative regulation of macromolecule metabolic process	negative regulation of gene expression	positive regulation of organelle organization	gene silencing	negative regulation of transcription	transcription activator activity
HOC1	orf19.10949	HOC1	CAL0004993	HOC1	0	0	1	1	0	0	2	alpha-1,6-mannosyltransferase complex	mannosyltransferase complex	Golgi apparatus part
NA	orf19.11598	orf19.11598	NA	NA	0	0	1	1	0	0	2
NGG1	orf19.3023	NGG1	CAL0001366	NGG1	0	0	1	0	0	1	2	histone acetyltransferase complex	SAGA complex	Ada2/Gcn5/Ada3 transcription activator complex	chromatin organization	protein modification process	protein amino acid acetylation	chromatin modification	covalent chromatin modification	histone modification	histone acetylation	macromolecule modification	protein amino acid acylation	post-translational protein modification	nucleoplasm part	SLIK (SAGA-like) complex	chromosome organization	SAGA-type complex
SPT7	orf19.7572	SPT7	CAL0000166	SPT7	0	0	1	0	0	1	2	reproduction	histone acetyltransferase complex	SAGA complex	conjugation	conjugation with cellular fusion	structural molecule activity	mitochondrion	chromatin organization	protein complex assembly	protein modification process	protein amino acid acetylation	chromatin modification	covalent chromatin modification	histone modification	histone acetylation	sexual reproduction	cellular component assembly	response to chemical stimulus	response to drug	macromolecule modification	protein amino acid acylation	post-translational protein modification	macromolecular complex subunit organization	nucleoplasm part	SLIK (SAGA-like) complex	chromosome organization	multi-organism process	macromolecular complex assembly	SAGA-type complex
PDE2	orf19.10489	PDE2	CAL0006104	PDE2	0	0	1	0	0	1	2	cyclic-nucleotide phosphodiesterase activity	3',5'-cyclic-nucleotide phosphodiesterase activity	3',5'-cyclic-AMP phosphodiesterase activity	plasma membrane organization	cellular cell wall organization	signal transduction	phosphoric diester hydrolase activity	pathogenesis	cellular membrane organization	hydrolase activity	hydrolase activity, acting on ester bonds	second-messenger-mediated signaling	cAMP-mediated signaling	cyclic-nucleotide-mediated signaling	biological adhesion	signaling pathway	intracellular signaling pathway	signaling process	signaling	signal transmission	filamentous growth	hyphal growth	fungal-type cell wall organization	intracellular signal transduction	growth	response to chemical stimulus	response to drug	phosphoric ester hydrolase activity	adhesion to host	interspecies interaction between organisms	external encapsulating structure organization	interaction with host	multi-organism process	adhesion to other organism involved in symbiotic interaction	membrane organization	cellular cell wall organization or biogenesis	cell wall organization or biogenesis	cell wall organization
VPS16	orf19.6848	VPS16	CAL0005772	VPS16	0	0	1	0	0	1	2	vacuole inheritance	fungal-type vacuole membrane	vacuolar membrane	protein targeting	protein targeting to vacuole	intracellular protein transport	post-Golgi vesicle-mediated transport	Golgi to endosome transport	cellular membrane fusion	vacuole organization	vacuolar transport	protein transport	cellular membrane organization	vesicle-mediated transport	endosome transport	HOPS complex	organelle membrane	regulation of vesicle fusion	regulation of localization	regulation of vacuole fusion, non-autophagic	regulation of organelle organization	CORVET complex	regulation of SNARE complex assembly	vacuole fusion, non-autophagic	regulation of protein complex assembly	regulation of cellular component biogenesis	regulation of vacuole organization	membrane part	vacuolar part	endosomal part	establishment of protein localization	late endosome to vacuole transport	intracellular transport	Golgi vesicle transport	organelle inheritance	regulation of transport	regulation of cellular component organization	establishment of localization in cell
CDR1	orf19.6000	CDR1	CAL0005016	PDR5	0	0	0	1	0	1	2	nucleotide binding	nucleoside binding	purine nucleoside binding	phospholipid-translocating ATPase activity	transporter activity	lipid transporter activity	ATP binding	phospholipid transporter activity	mitochondrion	plasma membrane	integral to plasma membrane	drug transmembrane transport	lipid transport	response to stress	response to oxidative stress	drug binding	response to endogenous stimulus	response to hormone stimulus	cell surface	response to organic substance	drug transmembrane transporter activity	fluconazole transporter activity	primary active transmembrane transporter activity	P-P-bond-hydrolysis-driven transmembrane transporter activity	organic alcohol transport	drug transport	fluconazole transport	phospholipid transport	integral to membrane	cellular membrane organization	pyrophosphatase activity	hydrolase activity	hydrolase activity, acting on acid anhydrides	hydrolase activity, acting on acid anhydrides, in phosphorus-containing anhydrides	hydrolase activity, acting on acid anhydrides, catalyzing transmembrane movement of substances	ATPase activity	purine nucleotide binding	nucleoside-triphosphatase activity
SEF1	orf19.3753	SEF1	CAL0001215	SEF1	0	0	0	1	0	1	2	nucleic acid binding	DNA binding	transcription factor activity	regulation of transcription, DNA-dependent	cellular ion homeostasis	cellular iron ion homeostasis	response to pH	response to abiotic stimulus	regulation of biosynthetic process	response to alkalinity	regulation of gene expression	regulation of macromolecule biosynthetic process	regulation of nucleobase, nucleoside, nucleotide and nucleic acid metabolic process	cellular homeostasis	cellular cation homeostasis	cellular di-, tri-valent inorganic cation homeostasis	transcription regulator activity	regulation of cellular biosynthetic process	iron assimilation	homeostatic process	regulation of transcription	chemical homeostasis	ion homeostasis	regulation of nitrogen compound metabolic process	regulation of RNA metabolic process	di-, tri-valent inorganic cation homeostasis	iron ion homeostasis	cation homeostasis	cellular chemical homeostasis	regulation of macromolecule metabolic process	regulation of biological quality	regulation of primary metabolic process
NA	orf19.6845	orf19.6845	CAL0005765	NA	0	0	0	1	0	1	2	nucleic acid binding	DNA binding	transcription factor activity	regulation of transcription, DNA-dependent	regulation of biosynthetic process	regulation of gene expression	regulation of macromolecule biosynthetic process	regulation of nucleobase, nucleoside, nucleotide and nucleic acid metabolic process	transcription regulator activity	regulation of cellular biosynthetic process	regulation of transcription	regulation of nitrogen compound metabolic process	regulation of RNA metabolic process	regulation of macromolecule metabolic process	regulation of primary metabolic process
NA	orf19.4529	orf19.4529	CAL0002700	SRP21	0	1	0	0	0	0	1
ASG1	orf19.166	ASG1	NA	ASG1	0	1	0	0	0	0	1
LPG20	orf19.771	LPG20	CAL0001933	YPL088W	0	1	0	0	0	0	1	oxidoreductase activity	oxidoreductase activity, acting on CH-OH group of donors	oxidoreductase activity, acting on the CH-OH group of donors, NAD or NADP as acceptor	aryl-alcohol dehydrogenase activity
CEK2	orf19.460	CEK2	CAL0005756	FUS3	0	1	0	0	0	0	1	reproduction	conjugation	conjugation with cellular fusion	protein kinase activity	protein serine/threonine kinase activity	receptor signaling protein serine/threonine kinase activity	MAP kinase activity	signal transducer activity	receptor signaling protein activity	protein modification process	protein amino acid phosphorylation	phosphorus metabolic process	phosphate metabolic process	kinase activity	phosphorylation	transferase activity	transferase activity, transferring phosphorus-containing groups	phosphotransferase activity, alcohol group as acceptor	sexual reproduction	filamentous growth	growth	macromolecule modification	post-translational protein modification	multi-organism process	molecular transducer activity
TEC1	orf19.5908	TEC1	CAL0003246	TEC1	0	1	0	0	0	0	1	nucleic acid binding	DNA binding	transcription factor activity	RNA polymerase II transcription factor activity	specific RNA polymerase II transcription factor activity	regulation of transcription, DNA-dependent	regulation of transcription from RNA polymerase II promoter	cell adhesion	positive regulation of transcription from RNA polymerase II promoter by pheromones	positive regulation of transcription by pheromones	regulation of transcription by pheromones	pathogenesis	regulation of biosynthetic process	positive regulation of biosynthetic process	positive regulation of metabolic process	response to organic substance	regulation of gene expression	regulation of gene-specific transcription from RNA polymerase II promoter	positive regulation of gene-specific transcription from RNA polymerase II promoter	regulation of macromolecule biosynthetic process	positive regulation of macromolecule biosynthetic process	positive regulation of macromolecule metabolic process	positive regulation of gene expression	regulation of nucleobase, nucleoside, nucleotide and nucleic acid metabolic process	response to pheromone	biological adhesion	filamentous growth	hyphal growth	transcription regulator activity	positive regulation of cellular metabolic process	regulation of cellular biosynthetic process	positive regulation of cellular biosynthetic process	regulation of gene-specific transcription	growth	response to chemical stimulus	biofilm formation	positive regulation of gene-specific transcription	single-species biofilm formation
TAF14	orf19.798	TAF14	CAL0002032	TAF14	0	1	0	0	0	0	1	histone acetyltransferase complex	nucleic acid binding	DNA binding	transcription factor activity	RNA polymerase II transcription factor activity	transcription factor complex	transcription factor TFIID complex	transcription factor TFIIF complex	chromatin organization	chromatin remodeling	transcription	transcription, DNA-dependent	regulation of transcription, DNA-dependent	transcription from RNA polymerase II promoter	protein modification process	protein amino acid acetylation	macromolecule biosynthetic process	regulation of biosynthetic process	regulation of gene expression	regulation of macromolecule biosynthetic process	general RNA polymerase II transcription factor activity	SWI/SNF complex	chromatin modification	covalent chromatin modification	histone modification	histone acetylation	chromatin remodeling complex	RSC complex	mediator complex	regulation of nucleobase, nucleoside, nucleotide and nucleic acid metabolic process	transcription regulator activity	Ino80 complex	regulation of cellular biosynthetic process	general transcription from RNA polymerase II promoter	RNA biosynthetic process	NuA3 histone acetyltransferase complex	DNA helicase complex	cellular macromolecular complex subunit organization
BMT5	orf19.1464	BMT5	CAL0004654	NA	0	1	0	0	0	0	1
NA	orf19.11450	orf19.11450	NA	NA	0	1	0	0	0	0	1
NA	orf19.6970	orf19.6970	CAL0000362	NA	0	1	0	0	0	0	1
PEX14	orf19.1805	PEX14	CAL0001580	PEX14	0	1	0	0	0	0	1	protein binding	peroxisomal membrane	protein complex assembly	protein import into peroxisome matrix, docking	cellular component assembly	protein binding, bridging	organelle membrane	microbody membrane	cellular macromolecular complex subunit organization	cellular macromolecular complex assembly	microbody	cellular protein complex assembly	macromolecular complex subunit organization	microbody part	peroxisomal part	macromolecular complex assembly
NA	orf19.4658	orf19.4658	CAL0003730	NA	0	1	0	0	0	0	1
ZCF14	orf19.2647	ZCF14	CAL0003462	HAP1	0	1	0	0	0	0	1	nucleic acid binding	DNA binding	transcription factor activity	regulation of transcription, DNA-dependent	regulation of biosynthetic process	regulation of gene expression	regulation of macromolecule biosynthetic process	regulation of nucleobase, nucleoside, nucleotide and nucleic acid metabolic process	transcription regulator activity	regulation of cellular biosynthetic process	regulation of transcription	regulation of nitrogen compound metabolic process	regulation of RNA metabolic process	regulation of macromolecule metabolic process	regulation of primary metabolic process
HAP5	orf19.1973	HAP5	CAL0002670	HAP5	0	1	0	0	0	0	1	nucleic acid binding	DNA binding	transcription factor activity	RNA polymerase II transcription factor activity	specific RNA polymerase II transcription factor activity	transcription factor complex	regulation of carbohydrate metabolic process	regulation of transcription, DNA-dependent	regulation of transcription from RNA polymerase II promoter	response to stress	cell communication	cellular response to starvation	response to pH	response to external stimulus	response to abiotic stimulus	regulation of biosynthetic process	response to extracellular stimulus	response to inorganic substance	response to metal ion	cellular response to iron ion starvation	response to alkalinity	regulation of gene expression	regulation of macromolecule biosynthetic process	CCAAT-binding factor complex	regulation of nucleobase, nucleoside, nucleotide and nucleic acid metabolic process	filamentous growth	hyphal growth	transcription regulator activity	regulation of cellular biosynthetic process	response to nutrient levels	cellular response to extracellular stimulus	cellular response to nutrient levels	regulation of transcription from RNA polymerase II promoter in response to iron ion starvation	cellular response to stress	growth	response to chemical stimulus	response to starvation	regulation of transcription from RNA polymerase II promoter in response to stress
NUP84	orf19.1298	NUP84	CAL0003108	NUP84	0	1	0	0	0	0	1	RNA export from nucleus	mRNA export from nucleus	nucleocytoplasmic transport	response to stress	response to DNA damage stimulus	nucleus organization	nuclear envelope organization	nuclear pore organization	nucleobase, nucleoside, nucleotide and nucleic acid transport	cellular membrane organization	Nup107-160 complex	cellular response to stress	cellular macromolecular complex subunit organization	macromolecular complex subunit organization	membrane part	intracellular transport	chromosome localization	nucleic acid transport	RNA transport	mRNA transport	nuclear export	nuclear transport	localization	establishment of RNA localization	organelle localization	cellular localization	establishment of localization in cell	cellular response to stimulus	membrane organization
NA	orf19.173	orf19.173	CAL0003208	AZF1	0	1	0	0	0	0	1	nucleic acid binding	DNA binding	transcription factor activity	regulation of transcription, DNA-dependent	regulation of biosynthetic process	regulation of gene expression	regulation of macromolecule biosynthetic process	regulation of nucleobase, nucleoside, nucleotide and nucleic acid metabolic process	transcription regulator activity	regulation of cellular biosynthetic process	response to chemical stimulus	response to drug	regulation of transcription	regulation of nitrogen compound metabolic process	regulation of RNA metabolic process	regulation of macromolecule metabolic process	regulation of primary metabolic process
ZCF34	orf19.6182	ZCF34	CAL0006117	PDR1	0	1	0	0	0	0	1	nucleic acid binding	DNA binding	transcription factor activity	regulation of transcription, DNA-dependent	regulation of biosynthetic process	regulation of gene expression	regulation of macromolecule biosynthetic process	regulation of nucleobase, nucleoside, nucleotide and nucleic acid metabolic process	transcription regulator activity	regulation of cellular biosynthetic process	response to chemical stimulus	response to drug	regulation of transcription	regulation of nitrogen compound metabolic process	regulation of RNA metabolic process	regulation of macromolecule metabolic process	regulation of primary metabolic process
NA	orf19.4125	orf19.4125	CAL0005633	NA	0	1	0	0	0	0	1	rDNA binding	nucleic acid binding	DNA binding	transcription factor activity	RNA polymerase III transcription factor activity	transcription	transcription, DNA-dependent	regulation of transcription, DNA-dependent	transcription from RNA polymerase III promoter	macromolecule biosynthetic process	rRNA transcription	regulation of biosynthetic process	regulation of gene expression	regulation of macromolecule biosynthetic process	regulation of nucleobase, nucleoside, nucleotide and nucleic acid metabolic process	transcription regulator activity	regulation of cellular biosynthetic process	RNA biosynthetic process	cellular macromolecule biosynthetic process	5S class rRNA transcription	sequence-specific DNA binding	regulation of transcription	regulation of nitrogen compound metabolic process	regulation of RNA metabolic process	regulation of macromolecule metabolic process	5S rDNA binding	regulation of primary metabolic process
THI20	orf19.889	THI20	CAL0002907	THI20	0	1	0	0	0	0	1	nucleic acid binding	DNA binding	transcription factor activity	cytosol	regulation of transcription, DNA-dependent	cellular aromatic compound metabolic process	vitamin metabolic process	water-soluble vitamin metabolic process	thiamin metabolic process	sulfur metabolic process	hydroxymethylpyrimidine kinase activity	phosphomethylpyrimidine kinase activity	catabolic process	vitamin biosynthetic process	vitamin catabolic process	thiamin biosynthetic process	thiamin catabolic process	regulation of biosynthetic process	regulation of gene expression	regulation of macromolecule biosynthetic process	kinase activity	transferase activity	transferase activity, transferring phosphorus-containing groups	phosphotransferase activity, alcohol group as acceptor	phosphotransferase activity, phosphate group as acceptor	hydrolase activity	hydrolase activity, acting on carbon-nitrogen (but not peptide) bonds	heterocycle biosynthetic process	regulation of nucleobase, nucleoside, nucleotide and nucleic acid metabolic process	aromatic compound biosynthetic process	aromatic compound catabolic process	transcription regulator activity	regulation of cellular biosynthetic process	water-soluble vitamin biosynthetic process	water-soluble vitamin catabolic process	thiamin and derivative metabolic process	thiamin and derivative biosynthetic process	thiamin and derivative catabolic process
RAD18	orf19.3407	RAD18	CAL0004874	RAD18	0	1	0	0	0	0	1	chromatin	nuclear chromatin	nucleic acid binding	DNA binding	single-stranded DNA binding	transcription factor activity	ubiquitin-protein ligase activity	DNA metabolic process	DNA replication	DNA-dependent DNA replication	DNA repair	postreplication repair	regulation of transcription, DNA-dependent	protein modification process	protein monoubiquitination	response to stress	response to DNA damage stimulus	macromolecule biosynthetic process	regulation of biosynthetic process	regulation of gene expression	regulation of macromolecule biosynthetic process	protein ubiquitination	ligase activity	ligase activity, forming carbon-nitrogen bonds	acid-amino acid ligase activity	regulation of nucleobase, nucleoside, nucleotide and nucleic acid metabolic process	small conjugating protein ligase activity	translesion synthesis	transcription regulator activity	regulation of cellular biosynthetic process	protein modification by small protein conjugation	cellular response to stress	cellular macromolecule biosynthetic process	error-free postreplication DNA repair	error-prone translesion synthesis	macromolecule modification	structure-specific DNA binding	post-translational protein modification
TAO3	orf19.1694	TAO3	CAL0000189	TAO3	0	1	0	0	0	0	1	incipient cellular bud site	cell morphogenesis	cytokinetic cell separation	nucleic acid binding	DNA binding	transcription factor activity	mitochondrion	cellular bud	regulation of transcription, DNA-dependent	cellular cell wall organization	budding cell bud growth	budding cell apical bud growth	establishment or maintenance of cell polarity	anatomical structure morphogenesis	regulation of biosynthetic process	regulation of gene expression	regulation of macromolecule biosynthetic process	regulation of nucleobase, nucleoside, nucleotide and nucleic acid metabolic process	site of polarized growth	filamentous growth	transcription regulator activity	regulation of cellular biosynthetic process	fungal-type cell wall organization	developmental process	cytokinetic process	cellular component morphogenesis	growth	response to chemical stimulus	response to drug	mating projection tip	cell projection part	external encapsulating structure organization	regulation of transcription	cellular developmental process	regulation of nitrogen compound metabolic process	regulation of RNA metabolic process	regulation of macromolecule metabolic process	cellular cell wall organization or biogenesis
RGT1	orf19.10261	RGT1	CAL0004232	RGT1	0	1	0	0	0	0	1	transcription cofactor activity	transcription corepressor activity	protein binding	carbohydrate metabolic process	monosaccharide metabolic process	glucose metabolic process	alcohol metabolic process	transcription factor binding	transcription activator activity	transcription repressor activity	hexose metabolic process	filamentous growth	transcription regulator activity	growth	cellular carbohydrate metabolic process
RGS2	orf19.695	RGS2	CAL0001166	NA	0	1	0	0	0	0	1
RIC1	orf19.6036	RIC1	CAL0005103	RIC1	0	1	0	0	0	0	1
NA	orf19.7410	orf19.7410	CAL0005453	CYM1	0	1	0	0	0	0	1	endopeptidase activity	metalloendopeptidase activity	mitochondrial intermembrane space	proteolysis	peptidase activity	metallopeptidase activity	hydrolase activity	organelle envelope lumen	membrane-enclosed lumen	mitochondrial part	proteolysis involved in cellular protein catabolic process	peptidase activity, acting on L-amino acid peptides
NA	orf19.3678	orf19.3678	CAL0000454	NA	0	1	0	0	0	0	1
NA	orf19.7576	orf19.7576	CAL0000178	NA	0	1	0	0	0	0	1
CMK1	orf19.5911	CMK1	CAL0003264	CMK1	0	1	0	0	0	0	1
SSN3	orf19.794	SSN3	CAL0002024	SSN3	1	0	0	0	0	0	1	nuclear-transcribed mRNA catabolic process	RNA catabolic process	mRNA catabolic process	catabolic process	macromolecule catabolic process	regulation of biosynthetic process	regulation of gene expression	regulation of macromolecule biosynthetic process	mRNA metabolic process	regulation of nucleobase, nucleoside, nucleotide and nucleic acid metabolic process	regulation of cellular biosynthetic process	cellular catabolic process	cellular macromolecule catabolic process	regulation of transcription	regulation of nitrogen compound metabolic process	regulation of macromolecule metabolic process	nuclear-transcribed mRNA catabolic process, non-stop decay	regulation of primary metabolic process
NA	orf19.4474	orf19.4474	CAL0001956	YNL155W	1	0	0	0	0	0	1
PBS2	orf19.7388	PBS2	CAL0004814	PBS2	1	0	0	0	0	0	1	protein import into nucleus, translocation	activation of MAPK activity involved in osmosensory signaling pathway	activation of MAPK activity	nuclear translocation of MAPK	nuclear translocation of MAPK involved in osmosensory signaling pathway	protein kinase activity	MAP kinase kinase activity	protein serine/threonine/tyrosine kinase activity	MAP-kinase scaffold activity	structural molecule activity	protein binding	cellular bud tip	cellular bud neck	protein modification process	protein amino acid phosphorylation	phosphorus metabolic process	phosphate metabolic process	intracellular protein transport	response to stress	response to osmotic stress	hyperosmotic response	cytoskeleton organization	actin filament organization	cellular cell wall organization	signal transduction	intracellular protein kinase cascade	response to abiotic stimulus	regulation of signal transduction	regulation of cell communication	protein transport	kinase activity	phosphorylation	transferase activity	transferase activity, transferring phosphorus-containing groups	phosphotransferase activity, alcohol group as acceptor	regulation of phosphate metabolic process	signal transmission via phosphorylation event	signaling pathway
ECM32	orf19.702	ECM32	CAL0001700	ECM32	1	0	0	0	0	0	1	DNA helicase activity	helicase activity	polysome	regulation of translation	regulation of translational termination	regulation of biosynthetic process	regulation of gene expression	regulation of macromolecule biosynthetic process	posttranscriptional regulation of gene expression	pyrophosphatase activity	hydrolase activity	hydrolase activity, acting on acid anhydrides	hydrolase activity, acting on acid anhydrides, in phosphorus-containing anhydrides	nucleoside-triphosphatase activity	ribonucleoprotein complex	regulation of cellular biosynthetic process	regulation of cellular protein metabolic process	regulation of protein complex disassembly	regulation of cellular component organization	regulation of protein metabolic process	regulation of macromolecule metabolic process	regulation of primary metabolic process
ZCF18	orf19.3405	ZCF18	CAL0004869	LYS14	1	0	0	0	0	0	1	nucleic acid binding	DNA binding	transcription factor activity	regulation of transcription, DNA-dependent	regulation of biosynthetic process	regulation of gene expression	regulation of macromolecule biosynthetic process	regulation of nucleobase, nucleoside, nucleotide and nucleic acid metabolic process	transcription regulator activity	regulation of cellular biosynthetic process	regulation of transcription	regulation of nitrogen compound metabolic process	regulation of RNA metabolic process	regulation of macromolecule metabolic process	regulation of primary metabolic process
NA	orf19.9326	orf19.9326	CAL0000873	MET32	1	0	0	0	0	0	1	nucleic acid binding	DNA binding	transcription factor activity	regulation of transcription, DNA-dependent	regulation of biosynthetic process	regulation of gene expression	regulation of macromolecule biosynthetic process	regulation of nucleobase, nucleoside, nucleotide and nucleic acid metabolic process	transcription regulator activity	regulation of cellular biosynthetic process	regulation of transcription	regulation of nitrogen compound metabolic process	regulation of RNA metabolic process	regulation of macromolecule metabolic process	regulation of primary metabolic process
RTG3	orf19.2315	RTG3	CAL0000674	RGT3	1	0	0	0	0	0	1	nucleic acid binding	DNA binding	transcription factor activity	regulation of transcription, DNA-dependent	regulation of biosynthetic process	regulation of gene expression	regulation of macromolecule biosynthetic process	regulation of nucleobase, nucleoside, nucleotide and nucleic acid metabolic process	transcription regulator activity	regulation of cellular biosynthetic process	regulation of transcription	regulation of nitrogen compound metabolic process	regulation of RNA metabolic process	regulation of macromolecule metabolic process	regulation of primary metabolic process
NA	orf19.5871	orf19.5871	CAL0002429	SNF5	1	0	0	0	0	0	1	DNA metabolic process	DNA repair	double-strand break repair	chromatin organization	chromatin remodeling	regulation of transcription, DNA-dependent	response to stress	response to DNA damage stimulus	regulation of biosynthetic process	positive regulation of biosynthetic process	positive regulation of metabolic process	regulation of gene expression	regulation of macromolecule biosynthetic process	positive regulation of macromolecule biosynthetic process	positive regulation of macromolecule metabolic process	positive regulation of gene expression	SWI/SNF complex	chromatin modification	chromatin remodeling complex	regulation of nucleobase, nucleoside, nucleotide and nucleic acid metabolic process	positive regulation of cellular metabolic process	regulation of cellular biosynthetic process	positive regulation of cellular biosynthetic process	cellular response to stress	ATP-dependent chromatin remodeling	regulation of transcription	positive regulation of transcription, DNA-dependent	positive regulation of nucleobase, nucleoside, nucleotide and nucleic acid metabolic process	positive regulation of transcription	positive regulation of biological process	positive regulation of cellular process	regulation of nitrogen compound metabolic process	positive regulation of nitrogen compound metabolic process	regulation of RNA metabolic process	positive regulation of RNA metabolic process	chromosome organization	cellular response to stimulus	regulation of macromolecule metabolic process
VPS15	orf19.130	VPS15	CAL0003067	VPS15	1	0	0	0	0	0	1	vacuole inheritance	protein kinase activity	protein serine/threonine kinase activity	mitochondrion	phosphoinositide 3-kinase complex	protein modification process	protein amino acid phosphorylation	protein targeting	protein targeting to vacuole	phosphorus metabolic process	phosphate metabolic process	intracellular protein transport	autophagy	response to stress	vacuole organization	vacuolar transport	cell communication	signal transduction	catabolic process	cellular response to starvation	response to external stimulus	response to extracellular stimulus	protein transport	vesicle-mediated transport	endosome transport	macroautophagy	kinase activity	phosphorylation	transferase activity	transferase activity, transferring phosphorus-containing groups	phosphotransferase activity, alcohol group as acceptor	second-messenger-mediated signaling	signaling pathway	intracellular signaling pathway	signaling process	signaling	signal transmission	response to nutrient levels
ZCF19	orf19.3876	ZCF19	CAL0002153	NA	1	0	0	0	0	0	1
PNA1	orf19.2217	PNA1	CAF0007418	NA	1	0	0	0	0	0	1
ZCF16	orf19.2808	ZCF16	CAL0005035	CAT8	1	0	0	0	0	0	1
DAL81	orf19.3252	DAL81	CAL0003338	DAL81	1	0	0	0	0	0	1	RNA polymerase II transcription factor activity	specific RNA polymerase II transcription factor activity	regulation of transcription, DNA-dependent	regulation of transcription from RNA polymerase II promoter	regulation of biosynthetic process	regulation of gene expression	regulation of macromolecule biosynthetic process	regulation of nucleobase, nucleoside, nucleotide and nucleic acid metabolic process	nitrogen utilization	transcription regulator activity	regulation of cellular biosynthetic process	regulation of transcription	regulation of nitrogen compound metabolic process	regulation of RNA metabolic process	regulation of macromolecule metabolic process	regulation of primary metabolic process
CTA7	orf19.4288	CTA7	CAL0000360	STB4	1	0	0	0	0	0	1	nucleic acid binding	DNA binding	transcription activator activity	transcription regulator activity	sequence-specific DNA binding
KNS1	orf19.4979	KNS1	CAL0006406	KNS1	1	0	0	0	0	0	1	protein kinase activity	protein serine/threonine kinase activity	protein tyrosine kinase activity	protein modification process	protein amino acid phosphorylation	phosphorus metabolic process	phosphate metabolic process	kinase activity	phosphorylation	transferase activity	transferase activity, transferring phosphorus-containing groups	phosphotransferase activity, alcohol group as acceptor	macromolecule modification	post-translational protein modification	protein amino acid autophosphorylation
NA	orf19.861	orf19.861	CAL0002806	YAP1	1	0	0	0	0	0	1	nucleic acid binding	DNA binding	transcription factor activity	regulation of transcription, DNA-dependent	regulation of biosynthetic process	regulation of gene expression	regulation of macromolecule biosynthetic process	regulation of nucleobase, nucleoside, nucleotide and nucleic acid metabolic process	transcription regulator activity	regulation of cellular biosynthetic process	regulation of transcription	regulation of nitrogen compound metabolic process	regulation of RNA metabolic process	regulation of macromolecule metabolic process	regulation of primary metabolic process
CZF1	orf19.3127	CZF1	CAL0002268	UME6	1	0	0	0	0	0	1	nucleic acid binding	DNA binding	transcription factor activity	regulation of transcription, DNA-dependent	regulation of biosynthetic process	regulation of gene expression	regulation of macromolecule biosynthetic process	regulation of nucleobase, nucleoside, nucleotide and nucleic acid metabolic process	filamentous growth	transcription regulator activity	regulation of cellular biosynthetic process	developmental process	growth	regulation of transcription	regulation of cell differentiation	cellular developmental process	regulation of developmental process	regulation of nitrogen compound metabolic process	regulation of RNA metabolic process	regulation of macromolecule metabolic process	regulation of primary metabolic process
NA	orf19.12307	orf19.12307	CAL0005378	AIR2	1	0	0	0	0	0	1	nuclear-transcribed mRNA catabolic process	nucleolus	RNA processing	tRNA metabolic process	RNA catabolic process	mRNA catabolic process	catabolic process	macromolecule catabolic process	mRNA metabolic process	rRNA metabolic process	snRNA metabolic process	snoRNA metabolic process	rRNA catabolic process	snRNA catabolic process	snoRNA catabolic process	tRNA catabolic process	RNA 3'-end processing	TRAMP complex	ncRNA processing	ncRNA metabolic process	ncRNA catabolic process	non-membrane-bounded organelle	intracellular non-membrane-bounded organelle	ncRNA 3'-end processing	ncRNA polyadenylation	RNA polyadenylation	modification-dependent macromolecule catabolic process	polyadenylation-dependent RNA catabolic process	polyadenylation-dependent ncRNA catabolic process	cellular catabolic process	cellular macromolecule catabolic process	RNA surveillance	nuclear RNA surveillance	nuclear mRNA surveillance	nuclear ncRNA surveillance	nuclear mRNA surveillance of mRNA 3'-end processing	CUT catabolic process	nuclear polyadenylation-dependent rRNA catabolic process
IME4	orf19.1476	IME4	CAL0004692	IME4	1	0	0	0	0	0	1	RNA methylation	mRNA (N6-adenosine)-methyltransferase activity	one-carbon metabolic process	meiosis	methyltransferase activity	RNA methyltransferase activity	mRNA methyltransferase activity	S-adenosylmethionine-dependent methyltransferase activity	RNA modification	mRNA metabolic process	mRNA modification	transferase activity	transferase activity, transferring one-carbon groups	cell cycle process	cell cycle phase	methylation	macromolecule modification	macromolecule methylation	mRNA methylation
SYG1	orf19.768	SYG1	CAL0001907	SYG1	1	0	0	0	0	0	1	mitochondrion	plasma membrane	signal transduction	signaling process	signal transmission
NA	orf19.5571	orf19.5571	CAL0006219	NA	1	0	0	0	0	0	1
IPF2147	orf19.7194	IPF2147	CAL0003161	NA	1	0	0	0	0	0	1	developmental process	development involved in symbiotic interaction	development of symbiont in host	development of symbiont involved in interaction with host
PAN3	orf19.4010	PAN3	CAL0004671	PAN3	1	0	0	0	0	0	1	DNA metabolic process	DNA repair	postreplication repair	RNA processing	mRNA processing	response to stress	response to DNA damage stimulus	mRNA metabolic process	RNA 3'-end processing	mRNA 3'-end processing	PAN complex	cellular response to stress	cellular response to stimulus
NA	orf19.4252	orf19.4252	CAL0000253	BUD32	1	0	0	0	0	0	1	cellular bud site selection	EKC/KEOPS protein complex	telomere maintenance	protein kinase activity	protein serine/threonine kinase activity	DNA metabolic process	regulation of transcription, DNA-dependent	regulation of transcription from RNA polymerase II promoter	protein modification process	protein amino acid phosphorylation	phosphorus metabolic process	phosphate metabolic process	cytokinesis, site selection	establishment or maintenance of cell polarity	regulation of biosynthetic process	positive regulation of biosynthetic process	positive regulation of metabolic process	regulation of gene expression	regulation of macromolecule biosynthetic process	positive regulation of macromolecule biosynthetic process	positive regulation of macromolecule metabolic process	positive regulation of gene expression	kinase activity	phosphorylation	transferase activity	transferase activity, transferring phosphorus-containing groups	phosphotransferase activity, alcohol group as acceptor	regulation of nucleobase, nucleoside, nucleotide and nucleic acid metabolic process	establishment of cell polarity	positive regulation of cellular metabolic process	regulation of cellular biosynthetic process	positive regulation of cellular biosynthetic process	telomere organization	cytokinetic process	homeostatic process	macromolecule modification	post-translational protein modification	regulation of transcription
HSL1	orf19.4308	HSL1	CAL0000894	HSL1	1	0	0	0	0	0	1	cell cycle checkpoint	G2/M transition of mitotic cell cycle	septin checkpoint	invasive growth in response to glucose limitation	protein kinase activity	cytoskeleton	cellular bud neck	septin ring	protein modification process	protein amino acid phosphorylation	phosphorus metabolic process	phosphate metabolic process	pathogenesis	kinase activity	phosphorylation	transferase activity	transferase activity, transferring phosphorus-containing groups	phosphotransferase activity, alcohol group as acceptor	cell cycle process	site of polarized growth	filamentous growth	cytokinesis checkpoint	septin cytoskeleton	regulation of cytokinesis	growth	response to chemical stimulus	response to drug	non-membrane-bounded organelle	intracellular non-membrane-bounded organelle	macromolecule modification	post-translational protein modification	growth involved in symbiotic interaction	growth of symbiont involved in interaction with host	growth of symbiont in host	filamentous growth of a population of unicellular organisms	cytoskeletal part	cell cortex part	protein amino acid autophosphorylation
FUN31	orf19.7451	FUN31	CAL0005577	PSK1	1	0	0	0	0	0	1	protein kinase activity	protein serine/threonine kinase activity	regulation of glycogen biosynthetic process	regulation of carbohydrate metabolic process	protein modification process	protein amino acid phosphorylation	phosphorus metabolic process	phosphate metabolic process	regulation of biosynthetic process	negative regulation of biosynthetic process	negative regulation of metabolic process	regulation of macromolecule biosynthetic process	negative regulation of macromolecule biosynthetic process	negative regulation of macromolecule metabolic process	regulation of cellular carbohydrate metabolic process	negative regulation of cellular carbohydrate metabolic process	regulation of glucose metabolic process	regulation of glucan biosynthetic process	kinase activity	phosphorylation	transferase activity	transferase activity, transferring phosphorus-containing groups	phosphotransferase activity, alcohol group as acceptor	negative regulation of cellular metabolic process	regulation of cellular biosynthetic process	negative regulation of cellular biosynthetic process	regulation of polysaccharide metabolic process	regulation of polysaccharide biosynthetic process	regulation of beta-glucan metabolic process	regulation of beta-glucan biosynthetic process	regulation of carbohydrate biosynthetic process	macromolecule modification	regulation of generation of precursor metabolites and energy	post-translational protein modification	negative regulation of glycogen biosynthetic process	negative regulation of carbohydrate metabolic process	negative regulation of biological process	negative regulation of cellular process
HOG1	orf19.895	HOG1	CAL0002931	HOG1	1	0	0	0	0	0	1	reproduction	MAPKKK cascade	chlamydospore formation	protein kinase activity	protein serine/threonine kinase activity	receptor signaling protein serine/threonine kinase activity	MAP kinase activity	signal transducer activity	receptor signaling protein activity	alcohol metabolic process	regulation of transcription, DNA-dependent	regulation of transcription from RNA polymerase II promoter	protein modification process	protein amino acid phosphorylation	phosphorus metabolic process	phosphate metabolic process	response to stress	response to osmotic stress	intracellular accumulation of glycerol	response to oxidative stress	cellular cell wall organization	signal transduction	osmosensory signaling pathway	intracellular protein kinase cascade	pathogenesis	response to abiotic stimulus	regulation of biosynthetic process	positive regulation of biosynthetic process	positive regulation of metabolic process	response to inorganic substance	response to metal ion	regulation of gene expression	regulation of macromolecule biosynthetic process	positive regulation of macromolecule biosynthetic process	positive regulation of macromolecule metabolic process	positive regulation of gene expression	kinase activity	phosphorylation
PKC1	orf19.5901	PKC1	CAL0003231	PKC1	1	0	0	0	0	0	1	cell fraction	plasma membrane enriched fraction	protein kinase activity	protein serine/threonine kinase activity	protein kinase C activity	cytoskeleton	protein modification process	protein amino acid phosphorylation	phosphorus metabolic process	phosphate metabolic process	autophagy	response to stress	cytoskeleton organization	actin filament organization	peroxisome organization	cellular cell wall organization	signal transduction	intracellular protein kinase cascade	catabolic process	response to temperature stimulus	response to cold	response to abiotic stimulus	kinase activity	phosphorylation	transferase activity	transferase activity, transferring phosphorus-containing groups	phosphotransferase activity, alcohol group as acceptor	signal transmission via phosphorylation event	signaling pathway	intracellular signaling pathway	signaling process	signaling	signal transmission	actin filament-based process	actin cytoskeleton organization	peroxisome degradation	site of polarized growth	fungal-type cell wall organization
LPF1	orf19.33	LPF1	CAL0000549	NA	1	0	0	0	0	0	1
ZCF25	orf19.4568	ZCF25	CAL0002836	ASG1	1	0	0	0	0	0	1	nucleic acid binding	DNA binding	transcription factor activity	regulation of transcription, DNA-dependent	regulation of biosynthetic process	regulation of gene expression	regulation of macromolecule biosynthetic process	regulation of nucleobase, nucleoside, nucleotide and nucleic acid metabolic process	transcription regulator activity	regulation of cellular biosynthetic process	regulation of transcription	regulation of nitrogen compound metabolic process	regulation of RNA metabolic process	regulation of macromolecule metabolic process	regulation of primary metabolic process
ZCF6	orf19.1497	ZCF6	CAL0004782	ASG1	1	0	0	0	0	0	1	nucleic acid binding	DNA binding	transcription factor activity	regulation of transcription, DNA-dependent	regulation of biosynthetic process	regulation of gene expression	regulation of macromolecule biosynthetic process	regulation of nucleobase, nucleoside, nucleotide and nucleic acid metabolic process	transcription regulator activity	regulation of cellular biosynthetic process	regulation of transcription	regulation of nitrogen compound metabolic process	regulation of RNA metabolic process	regulation of macromolecule metabolic process	regulation of primary metabolic process
UME7	orf19.2745	UME7	CAL0004230	UME6	1	0	0	0	0	0	1	nucleic acid binding	DNA binding	transcription factor activity	regulation of transcription, DNA-dependent	regulation of biosynthetic process	regulation of gene expression	regulation of macromolecule biosynthetic process	regulation of nucleobase, nucleoside, nucleotide and nucleic acid metabolic process	transcription regulator activity	regulation of cellular biosynthetic process	regulation of transcription	regulation of nitrogen compound metabolic process	regulation of RNA metabolic process	regulation of macromolecule metabolic process	regulation of primary metabolic process
NA	orf19.2105	orf19.2105	CAL0005267	CWC24	1	0	0	0	0	0	1	spliceosomal complex	U2-type spliceosomal complex	RNA processing	RNA splicing	snoRNA metabolic process	ribonucleoprotein complex	snoRNA splicing	ncRNA processing	ncRNA metabolic process	snoRNA processing
NA	orf19.3869	orf19.3869	CAL0002127	NA	0	0	0	0	1	0	1
TUP1	orf19.6109	TUP1	CAL0005939	TUP1	0	0	0	0	1	0	1	negative regulation of transcription from RNA polymerase II promoter	cell fraction	soluble fraction	chromatin organization	chromatin assembly or disassembly	regulation of transcription, DNA-dependent	regulation of transcription from RNA polymerase II promoter	cell adhesion	quorum sensing	pathogenesis	response to biotic stimulus	regulation of biosynthetic process	negative regulation of biosynthetic process	negative regulation of metabolic process	response to inorganic substance	response to metal ion	regulation of gene expression	regulation of macromolecule biosynthetic process	negative regulation of macromolecule biosynthetic process	negative regulation of macromolecule metabolic process	negative regulation of gene expression	cell-cell adhesion	negative regulation of transcription	transcription repressor activity	general transcriptional repressor activity	nucleosome positioning	transcriptional repressor complex	regulation of lipid metabolic process	regulation of nucleobase, nucleoside, nucleotide and nucleic acid metabolic process	regulation of isoprenoid metabolic process	cellular component assembly	biological adhesion	filamentous growth	hyphal growth	transcription regulator activity	negative regulation of cellular metabolic process	regulation of cellular biosynthetic process	negative regulation of cellular biosynthetic process
SPT20	orf19.422	SPT20	CAL0005609	NA	0	0	0	0	1	0	1
BCR1	orf19.723	BCR1	CAL0001773	USV1	0	0	0	0	1	0	1	nucleic acid binding	DNA binding	transcription factor activity	RNA polymerase II transcription factor activity	specific RNA polymerase II transcription factor activity	regulation of transcription, DNA-dependent	regulation of transcription from RNA polymerase II promoter	regulation of biosynthetic process	positive regulation of biosynthetic process	positive regulation of metabolic process	regulation of gene expression	regulation of macromolecule biosynthetic process	positive regulation of macromolecule biosynthetic process	positive regulation of macromolecule metabolic process	positive regulation of gene expression	regulation of nucleobase, nucleoside, nucleotide and nucleic acid metabolic process	filamentous growth	transcription regulator activity	positive regulation of cellular metabolic process	regulation of cellular biosynthetic process	positive regulation of cellular biosynthetic process	growth	biofilm formation	single-species biofilm formation	single-species biofilm formation on inanimate substrate	regulation of transcription	positive regulation of transcription, DNA-dependent	positive regulation of nucleobase, nucleoside, nucleotide and nucleic acid metabolic process	positive regulation of transcription	positive regulation of transcription from RNA polymerase II promoter	positive regulation of biological process	positive regulation of cellular process	regulation of nitrogen compound metabolic process	positive regulation of nitrogen compound metabolic process	regulation of RNA metabolic process	positive regulation of RNA metabolic process	intraspecies interaction between organisms	multi-organism process
SPT3	orf19.7622	SPT3	CAL0000847	SPT3	0	0	0	0	1	0	1	histone acetyltransferase complex	SAGA complex	invasive growth in response to glucose limitation	transcription cofactor activity	protein binding	chromatin organization	transcription	transcription, DNA-dependent	transcription from RNA polymerase II promoter	protein modification process	protein amino acid acetylation	pseudohyphal growth	transcription factor binding	macromolecule biosynthetic process	pathogenesis	cell growth	chromatin modification	covalent chromatin modification	histone modification	histone acetylation	filamentous growth	transcription regulator activity	gene-specific transcription from RNA polymerase II promoter	RNA biosynthetic process	cellular macromolecule biosynthetic process	growth	macromolecule modification	protein amino acid acylation	post-translational protein modification	filamentous growth of a population of unicellular organisms	nucleoplasm part	SLIK (SAGA-like) complex	chromosome organization	multi-organism process	SAGA-type complex	growth of unicellular organism as a thread of attached cells
UBP14	orf19.1516	UBP14	CAL0005412	UBP14	0	0	0	0	1	0	1	ubiquitin-specific protease activity	regulation of carbohydrate metabolic process	regulation of gluconeogenesis	proteolysis	ubiquitin-dependent protein catabolic process	peptidase activity	cysteine-type peptidase activity	catabolic process	macromolecule catabolic process	regulation of biosynthetic process	negative regulation of biosynthetic process	negative regulation of metabolic process	proteasomal protein catabolic process	regulation of cellular ketone metabolic process	regulation of cellular carbohydrate metabolic process	negative regulation of cellular carbohydrate metabolic process	regulation of glucose metabolic process	hydrolase activity	small conjugating protein-specific protease activity	modification-dependent protein catabolic process	negative regulation of cellular metabolic process	regulation of cellular biosynthetic process	negative regulation of cellular biosynthetic process	proteasomal ubiquitin-dependent protein catabolic process	regulation of carbohydrate biosynthetic process	modification-dependent macromolecule catabolic process	cellular catabolic process	cellular macromolecule catabolic process	negative regulation of gluconeogenesis	negative regulation of carbohydrate metabolic process	negative regulation of biological process	negative regulation of cellular process	proteolysis involved in cellular protein catabolic process	peptidase activity, acting on L-amino acid peptides	regulation of primary metabolic process
NA	orf19.13396	orf19.13396	CAL0003428	ADR1	0	0	0	0	1	0	1	nucleic acid binding	DNA binding	transcription factor activity	regulation of transcription, DNA-dependent	regulation of biosynthetic process	regulation of gene expression	regulation of macromolecule biosynthetic process	regulation of nucleobase, nucleoside, nucleotide and nucleic acid metabolic process	transcription regulator activity	regulation of cellular biosynthetic process	regulation of transcription	regulation of nitrogen compound metabolic process	regulation of RNA metabolic process	regulation of macromolecule metabolic process	regulation of primary metabolic process
NA	orf19.1729	orf19.1729	CAL0000814	NA	0	0	0	0	1	0	1	nucleic acid binding	DNA binding	transcription factor activity	regulation of transcription, DNA-dependent	regulation of biosynthetic process	regulation of gene expression	regulation of macromolecule biosynthetic process	regulation of nucleobase, nucleoside, nucleotide and nucleic acid metabolic process	transcription regulator activity	regulation of cellular biosynthetic process	regulation of transcription	regulation of nitrogen compound metabolic process	regulation of RNA metabolic process	regulation of macromolecule metabolic process	regulation of primary metabolic process
NA	orf19.3835	orf19.3835	CAL0002026	TFC3	0	0	0	0	1	0	1	transcription factor TFIIIC complex	nucleic acid binding	DNA binding	transcription factor activity	transcription factor complex	mitochondrion	regulation of transcription, DNA-dependent	protein localization	regulation of biosynthetic process	regulation of gene expression	regulation of macromolecule biosynthetic process	regulation of nucleobase, nucleoside, nucleotide and nucleic acid metabolic process	transcription regulator activity	regulation of cellular biosynthetic process	macromolecule localization	protein localization to chromosome	cellular protein localization	nucleoplasm part	regulation of transcription	regulation of nitrogen compound metabolic process	localization	regulation of RNA metabolic process	cellular localization	regulation of macromolecule metabolic process	cellular macromolecule localization	protein localization to chromatin	regulation of primary metabolic process
BUB1	orf19.2678	BUB1	CAL0003517	BUB1	0	0	0	0	1	0	1	microtubule cytoskeleton organization	kinetochore	condensed chromosome kinetochore	condensed nuclear chromosome kinetochore	protein kinase activity	protein modification process	protein amino acid phosphorylation	phosphorus metabolic process	phosphate metabolic process	cytoskeleton organization	microtubule-based process	protein localization	kinase activity	phosphorylation	transferase activity	transferase activity, transferring phosphorus-containing groups	phosphotransferase activity, alcohol group as acceptor	cell cycle process	sister chromatid biorientation	maintenance of protein location in cell	macromolecule localization	microtubule anchoring	protein localization to kinetochore	cellular protein localization	response to chemical stimulus	response to drug	non-membrane-bounded organelle	intracellular non-membrane-bounded organelle	macromolecule modification	post-translational protein modification	chromosomal part	nuclear chromosome part	maintenance of protein location	localization	maintenance of location	attachment of spindle microtubules to chromosome	cellular localization	maintenance of location in cell
ECM25	orf19.4958	ECM25	CAL0006338	ECM25	0	0	0	0	1	0	1	cellular cell wall organization	filamentous growth	fungal-type cell wall organization	growth	external encapsulating structure organization	cellular cell wall organization or biogenesis	cell wall organization or biogenesis	cell wall organization
SUN41	orf19.3642	SUN41	CAL0000399	SIM1	0	0	0	0	1	0	1	cytokinetic cell separation	extracellular region	cell wall	cellular cell wall organization	fungal-type cell wall	pathogenesis	cell surface	biological adhesion	external encapsulating structure	fungal-type cell wall organization	cytokinetic process	biofilm formation	adhesion to host	interspecies interaction between organisms	external encapsulating structure organization	interaction with host	multi-organism process	adhesion to other organism involved in symbiotic interaction	cellular cell wall organization or biogenesis	cell wall organization or biogenesis	cell wall organization
ECM17	orf19.11580	ECM17	CAL0004978	MET5	0	0	1	0	0	0	1	sulfate assimilation	sulfur metabolic process	cellular cell wall organization	sulfite reductase complex (NADPH)	fungal-type cell wall organization	external encapsulating structure organization	cellular cell wall organization or biogenesis	cell wall organization or biogenesis	cell wall organization
NA	orf19.1178	orf19.1178	CAL0002100	NA	0	0	1	0	0	0	1	nucleic acid binding	DNA binding	transcription factor activity	regulation of transcription, DNA-dependent	regulation of biosynthetic process	regulation of gene expression	regulation of macromolecule biosynthetic process	regulation of nucleobase, nucleoside, nucleotide and nucleic acid metabolic process	transcription regulator activity	regulation of cellular biosynthetic process	regulation of transcription	regulation of nitrogen compound metabolic process	regulation of RNA metabolic process	regulation of macromolecule metabolic process	regulation of primary metabolic process
GUA1	orf19.12276	GUA1	CAL0005313	GUA1	0	0	1	0	0	0	1	cell fraction	GMP synthase (glutamine-hydrolyzing) activity	soluble fraction	purine nucleotide metabolic process	nucleoside phosphate metabolic process	nucleotide metabolic process	nucleoside monophosphate metabolic process	purine nucleoside monophosphate metabolic process	purine ribonucleotide metabolic process	ribonucleoside monophosphate metabolic process	purine ribonucleoside monophosphate metabolic process	ribonucleotide metabolic process	ligase activity	ligase activity, forming carbon-nitrogen bonds	carbon-nitrogen ligase activity, with glutamine as amido-N-donor	GMP metabolic process	heterocycle metabolic process	nucleobase, nucleoside and nucleotide metabolic process
SEC34	orf19.4440	SEC34	CAL0001837	COG3	0	0	1	0	0	0	1	cell fraction	peripheral to membrane of membrane fraction	retrograde transport, vesicle recycling within Golgi	membrane fraction	soluble fraction	insoluble fraction	ER to Golgi vesicle-mediated transport	intra-Golgi vesicle-mediated transport	vesicle-mediated transport	Golgi transport complex	Golgi apparatus part	intracellular transport	Golgi vesicle transport	establishment of localization in cell
GCD14	orf19.7291	GCD14	CAL0004011	GCD14	0	0	1	0	0	0	1	RNA methylation	RNA processing	tRNA metabolic process	tRNA modification	one-carbon metabolic process	tRNA processing	RNA modification	tRNA methylation	tRNA (m1A) methyltransferase complex	methylation	ncRNA processing	ncRNA metabolic process	methyltransferase complex	macromolecule modification	macromolecule methylation	tRNA methyltransferase complex
KIS1	orf19.4084	KIS1	CAL0004936	GAl83	0	0	1	0	0	0	1	invasive growth in response to glucose limitation	structural molecule activity	protein binding	nuclear envelope lumen	regulation of carbohydrate metabolic process	protein modification process	protein amino acid phosphorylation	phosphorus metabolic process	phosphate metabolic process	cell adhesion	signal transduction	phosphorylation	biological adhesion	signaling process	signal transmission	receptor signaling complex scaffold activity	filamentous growth	AMP-activated protein kinase complex	organelle envelope lumen	membrane-enclosed lumen	protein complex scaffold	growth	response to chemical stimulus	response to drug	regulation of protein complex assembly	macromolecule modification	post-translational protein modification	regulation of cellular component biogenesis	filamentous growth of a population of unicellular organisms	regulation of cellular component organization	growth of unicellular organism as a thread of attached cells	regulation of primary metabolic process
NA	orf19.5224	orf19.5224	CAL0003522	PKH1	0	0	1	0	0	0	1	MAPKKK cascade	MAPKKK cascade involved in cell wall biogenesis	protein kinase activity	cytosol	cell cortex	protein modification process	protein amino acid phosphorylation	phosphorus metabolic process	phosphate metabolic process	endocytosis	signal transduction	intracellular protein kinase cascade	membrane invagination	cellular membrane organization	vesicle-mediated transport	kinase activity	phosphorylation	transferase activity	transferase activity, transferring phosphorus-containing groups	phosphotransferase activity, alcohol group as acceptor	signal transmission via phosphorylation event	signaling pathway	intracellular signaling pathway	signaling process	signaling	signal transmission	intracellular signal transduction	macromolecule modification	post-translational protein modification	membrane organization
KIN2	orf19.7510	KIN2	CAL0006385	KIN2	0	0	1	0	0	0	1	protein kinase activity	protein serine/threonine kinase activity	plasma membrane	protein modification process	protein amino acid phosphorylation	phosphorus metabolic process	phosphate metabolic process	exocytosis	vesicle-mediated transport	kinase activity	phosphorylation	transferase activity	transferase activity, transferring phosphorus-containing groups	phosphotransferase activity, alcohol group as acceptor	secretion by cell	macromolecule modification	post-translational protein modification	protein amino acid autophosphorylation	secretion	establishment of localization in cell
MKC1	orf19.7523	MKC1	CAL0000003	SLT2	0	0	1	0	0	0	1	response to reactive oxygen species	barrier septum formation	response to acid	protein kinase activity	protein serine/threonine kinase activity	receptor signaling protein serine/threonine kinase activity	MAP kinase activity	signal transducer activity	receptor signaling protein activity	cellular bud tip	RNA processing	mRNA processing	protein modification process	protein amino acid phosphorylation	phosphorus metabolic process	phosphate metabolic process	autophagy	response to stress	response to oxidative stress	peroxisome organization	cellular cell wall organization	signal transduction	intracellular protein kinase cascade	regulation of cell size	catabolic process	response to temperature stimulus	pathogenesis	response to heat	response to abiotic stimulus	response to inorganic substance	mRNA metabolic process	kinase activity	phosphorylation	transferase activity	transferase activity, transferring phosphorus-containing groups	phosphotransferase activity, alcohol group as acceptor	cellular component assembly	signal transmission via phosphorylation event
SIP3	orf19.3047	SIP3	CAL0001414	SIP3	0	0	1	0	0	0	1	transcription cofactor activity	protein binding	regulation of transcription, DNA-dependent	regulation of transcription from RNA polymerase II promoter	transcription factor binding	regulation of biosynthetic process	positive regulation of biosynthetic process	positive regulation of metabolic process	regulation of gene expression	regulation of macromolecule biosynthetic process	positive regulation of macromolecule biosynthetic process	positive regulation of macromolecule metabolic process	positive regulation of gene expression	regulation of nucleobase, nucleoside, nucleotide and nucleic acid metabolic process	transcription regulator activity	positive regulation of cellular metabolic process	regulation of cellular biosynthetic process	positive regulation of cellular biosynthetic process	response to chemical stimulus	response to drug	regulation of transcription	positive regulation of transcription, DNA-dependent	positive regulation of nucleobase, nucleoside, nucleotide and nucleic acid metabolic process	positive regulation of transcription	positive regulation of transcription from RNA polymerase II promoter	positive regulation of biological process	positive regulation of cellular process	regulation of nitrogen compound metabolic process	positive regulation of nitrogen compound metabolic process	regulation of RNA metabolic process	positive regulation of RNA metabolic process	regulation of macromolecule metabolic process	regulation of primary metabolic process
NA	orf19.5253	orf19.5253	CAL0003566	YAK1	0	0	1	0	0	0	1
NA	orf19.844	orf19.844	CAL0002751	STE11	0	0	1	0	0	0	1	MAPKKK cascade involved in osmosensory signaling pathway	MAPKKK cascade	activation of MAPKK activity	MAPKKK cascade involved in cell wall biogenesis	pheromone-dependent signal transduction involved in conjugation with cellular fusion	signal transduction involved in filamentous growth	invasive growth in response to glucose limitation	protein kinase activity	protein serine/threonine kinase activity	receptor signaling protein serine/threonine kinase activity	MAP kinase kinase kinase activity	signal transducer activity	receptor signaling protein activity	protein binding	protein modification process	protein amino acid phosphorylation	phosphorus metabolic process	phosphate metabolic process	response to stress	response to osmotic stress	pseudohyphal growth	signal transduction	cell surface receptor linked signaling pathway	G-protein coupled receptor protein signaling pathway	osmosensory signaling pathway	osmosensory signaling pathway via Sho1 osmosensor	intracellular protein kinase cascade	response to abiotic stimulus	regulation of transposition, RNA-mediated	regulation of transposition	cell growth	kinase activity	phosphorylation	transferase activity	transferase activity, transferring phosphorus-containing groups	phosphotransferase activity, alcohol group as acceptor	regulation of phosphate metabolic process	protein domain specific binding
MKK2	orf19.6889	MKK2	CAL0005911	MKK2	0	0	1	0	0	0	1	autophagy	peroxisome organization	signal transduction	catabolic process	signaling process	signal transmission	peroxisome degradation	response to chemical stimulus	response to drug	cellular catabolic process
SNF7	orf19.13461	SNF7	CAL0005125	SNF7	0	0	1	0	0	0	1	ESCRT III complex	protein targeting	protein targeting to vacuole	intracellular protein transport	membrane budding	response to stress	vacuolar transport	cellular cell wall organization	signal transduction	response to pH	pathogenesis	response to abiotic stimulus	response to inorganic substance	response to metal ion	response to lithium ion	protein transport	cellular membrane organization	vesicle organization	vesicle-mediated transport	endosome transport	protein processing	signaling process	signal transmission	filamentous growth	hyphal growth	fungal-type cell wall organization	response to anoxia	growth	response to chemical stimulus	response to drug	membrane part	endosomal part	establishment of protein localization	external encapsulating structure organization	late endosome to vacuole transport	intracellular transport	protein maturation	establishment of localization in cell
MNN9	orf19.7383	MNN9	CAL0004800	MNN9	0	0	1	0	0	0	1	mannosyltransferase activity	cell wall mannoprotein biosynthetic process	alpha-1,6-mannosyltransferase complex	barrier septum formation	carbohydrate metabolic process	mannoprotein metabolic process	mannoprotein biosynthetic process	protein modification process	protein amino acid glycosylation	protein amino acid N-linked glycosylation	cellular cell wall organization	macromolecule biosynthetic process	glycoprotein metabolic process	glycoprotein biosynthetic process	cellular cell wall macromolecule metabolic process	integral to membrane	transferase activity	transferase activity, transferring glycosyl groups	transferase activity, transferring hexosyl groups	cellular component assembly	intrinsic to membrane	mannosyltransferase complex	fungal-type cell wall organization	cell wall glycoprotein biosynthetic process	cytokinetic process	cellular macromolecule biosynthetic process	response to chemical stimulus	response to drug	macromolecule modification	macromolecule glycosylation	cell wall macromolecule metabolic process	cell wall macromolecule biosynthetic process	cellular carbohydrate metabolic process	membrane part	Golgi apparatus part	external encapsulating structure organization	glycosylation	cellular component macromolecule biosynthetic process
TPS1	orf19.6640	TPS1	CAL0004028	TPS1	0	0	1	0	0	0	1	alpha,alpha-trehalose-phosphate synthase (UDP-forming) activity	alpha,alpha-trehalose-phosphate synthase complex (UDP-forming)	carbohydrate metabolic process	disaccharide metabolic process	trehalose metabolic process	trehalose biosynthetic process	response to stress	UDP-glycosyltransferase activity	oligosaccharide metabolic process	oligosaccharide biosynthetic process	pathogenesis	carbohydrate biosynthetic process	glycoside metabolic process	glycoside biosynthetic process	transferase activity	transferase activity, transferring glycosyl groups	transferase activity, transferring hexosyl groups	filamentous growth	hyphal growth	cellular carbohydrate biosynthetic process	UDP-glucosyltransferase activity	growth	cellular carbohydrate metabolic process	disaccharide biosynthetic process	glucosyltransferase activity	multi-organism process
REI1	orf19.59	REI1	CAL0000609	REI1	0	0	1	0	0	0	1	mitotic cell cycle	nucleic acid binding	DNA binding	nucleocytoplasmic transport	cell cycle	budding cell bud growth	ribonucleoprotein complex biogenesis	growth	ribosomal large subunit biogenesis	sequence-specific DNA binding	cellular component biogenesis	intracellular transport	nuclear transport	establishment of localization in cell
NBN1	orf19.878	NBN1	CAL0002865	YNG2	0	0	1	0	0	0	1	histone acetyltransferase complex	protein binding	DNA metabolic process	DNA repair	chromatin organization	protein modification process	protein amino acid acetylation	response to stress	response to DNA damage stimulus	chromatin modification	covalent chromatin modification	histone modification	histone acetylation	filamentous growth	hyphal growth	Piccolo NuA4 histone acetyltransferase complex	cellular response to stress	methylated histone residue binding	NuA4 histone acetyltransferase complex	growth	histone binding	H4/H2A histone acetyltransferase complex	macromolecule modification	protein amino acid acylation	post-translational protein modification	nucleoplasm part	chromosome organization	cellular response to stimulus
VPS28	orf19.212	VPS28	CAL0003892	VPS28	0	0	1	0	0	0	1	ESCRT I complex	protein targeting	protein targeting to membrane	protein targeting to vacuole	intracellular protein transport	vacuolar transport	cellular cell wall organization	response to pH	pathogenesis	response to abiotic stimulus	response to inorganic substance	response to metal ion	response to lithium ion	protein transport	protein processing	filamentous growth	hyphal growth	fungal-type cell wall organization	growth	response to chemical stimulus	response to drug	membrane part	endosomal part	establishment of protein localization	external encapsulating structure organization	intracellular transport	protein maturation	establishment of localization in cell	multi-organism process	cellular cell wall organization or biogenesis	cell wall organization or biogenesis	cell wall organization
CNA1	orf19.6033	CNA1	CAL0005100	CMP2	0	0	1	0	0	0	1	response to pheromone involved in conjugation with cellular fusion	adaptation of signaling pathway by response to pheromone involved in conjugation with cellular fusion	phosphoprotein phosphatase activity	protein serine/threonine phosphatase activity	calcium-dependent protein serine/threonine phosphatase activity	calcineurin complex	cellular ion homeostasis	response to stress	response to osmotic stress	cellular cell wall organization	protein serine/threonine phosphatase complex	pathogenesis	response to abiotic stimulus	response to salt stress	response to organic substance	hydrolase activity	hydrolase activity, acting on ester bonds	phosphatase activity	response to pheromone	cellular homeostasis	adaptation of signaling pathway	filamentous growth	hyphal growth	fungal-type cell wall organization	regulation of signaling pathway	growth	response to chemical stimulus	response to drug	phosphoric ester hydrolase activity	homeostatic process	response to cation stress	external encapsulating structure organization	chemical homeostasis	ion homeostasis	multi-organism process	cellular response to stimulus	cellular chemical homeostasis	regulation of biological quality
NA	orf19.1085	orf19.1085	CAL0001253	UBC1	0	0	1	0	0	0	1	proteasome complex	ubiquitin-protein ligase activity	protein modification process	proteolysis	ubiquitin-dependent protein catabolic process	catabolic process	macromolecule catabolic process	proteasomal protein catabolic process	vesicle organization	protein ubiquitination	ligase activity	ligase activity, forming carbon-nitrogen bonds	acid-amino acid ligase activity	small conjugating protein ligase activity	modification-dependent protein catabolic process	ER-associated protein catabolic process	protein modification by small protein conjugation	protein ubiquitination involved in ubiquitin-dependent protein catabolic process	proteasomal ubiquitin-dependent protein catabolic process	macromolecule modification	modification-dependent macromolecule catabolic process	post-translational protein modification	cellular catabolic process	cellular macromolecule catabolic process	proteolysis involved in cellular protein catabolic process	protein modification by small protein conjugation or removal
NA	orf19.7693	orf19.7693	CAL0000520	SYM1	0	0	1	0	0	0	1
NA	orf19.5651	orf19.5651	CAL0000662	JHD2	0	0	1	0	0	0	1	chromatin organization	protein modification process	protein amino acid demethylation	one-carbon metabolic process	protein amino acid dealkylation	chromatin modification	covalent chromatin modification	histone modification	histone demethylation	demethylase activity	histone demethylase activity	histone demethylase activity (H3-K4 specific)	macromolecule modification	post-translational protein modification	chromosome organization	demethylation
NA	orf19.4981	orf19.4981	CAL0000007	YDL206W	0	0	1	0	0	0	1
SRB8	orf19.736	SRB8	CAL0001805	SRB8	0	0	1	0	0	0	1
NA	orf19.3744	orf19.3744	CAL0001199	CEX1	0	0	1	0	0	0	1	tRNA binding	nucleic acid binding	RNA binding	RNA export from nucleus	tRNA export from nucleus	nucleocytoplasmic transport	nucleobase, nucleoside, nucleotide and nucleic acid transport	intracellular transport	nucleic acid transport	RNA transport	tRNA transport	nuclear export	nuclear transport	establishment of RNA localization	establishment of localization in cell
CBK1	orf19.4909	CBK1	CAL0006211	CBK1	0	0	1	0	0	0	1	incipient cellular bud site	cell morphogenesis involved in conjugation with cellular fusion	cell morphogenesis involved in conjugation	cell morphogenesis	cytokinetic cell separation	reproductive developmental process	protein kinase activity	protein serine/threonine kinase activity	cellular bud tip	cellular bud neck	cell cortex	regulation of transcription, DNA-dependent	regulation of transcription from RNA polymerase II promoter	protein modification process	protein amino acid phosphorylation	phosphorus metabolic process	phosphate metabolic process	cytoskeleton organization	cellular cell wall organization	regulation of exit from mitosis	budding cell bud growth	budding cell apical bud growth	establishment or maintenance of cell polarity	regulation of mitotic cell cycle	protein localization	anatomical structure morphogenesis	regulation of biosynthetic process	regulation of gene expression	regulation of macromolecule biosynthetic process	regulation of cell cycle process	cellular membrane organization	kinase activity	phosphorylation	transferase activity	transferase activity, transferring phosphorus-containing groups	phosphotransferase activity, alcohol group as acceptor	regulation of nucleobase, nucleoside, nucleotide and nucleic acid metabolic process	reproductive process
CTA4	orf19.7374	CTA4	CAL0004760	OAF1	0	0	1	0	0	0	1	regulation of transcription, DNA-dependent	regulation of transcription from RNA polymerase II promoter	response to biotic stimulus	regulation of biosynthetic process	positive regulation of biosynthetic process	positive regulation of metabolic process	regulation of gene expression	regulation of macromolecule biosynthetic process	positive regulation of macromolecule biosynthetic process	positive regulation of macromolecule metabolic process	positive regulation of gene expression	transcription activator activity	regulation of nucleobase, nucleoside, nucleotide and nucleic acid metabolic process	transcription regulator activity	positive regulation of cellular metabolic process	regulation of cellular biosynthetic process	positive regulation of cellular biosynthetic process	interspecies interaction between organisms	regulation of transcription	positive regulation of transcription, DNA-dependent	positive regulation of nucleobase, nucleoside, nucleotide and nucleic acid metabolic process	positive regulation of transcription	positive regulation of transcription from RNA polymerase II promoter	positive regulation of biological process	positive regulation of cellular process	regulation of nitrogen compound metabolic process	positive regulation of nitrogen compound metabolic process	regulation of RNA metabolic process	positive regulation of RNA metabolic process	interaction with host	multi-organism process	response to other organism	response to defenses of other organism involved in symbiotic interaction	response to host defenses	response to defense-related nitric oxide production by other organism involved in symbiotic interaction	response to immune response of other organism involved in symbiotic interaction	response to defense-related host nitric oxide production	response to host immune response
HAP43	orf19.681	HAP43	CAL0001129	YAP3	0	0	1	0	0	0	1	transcription cofactor activity	transcription coactivator activity	protein binding	transcription factor complex	regulation of transcription, DNA-dependent	regulation of transcription from RNA polymerase II promoter	cellular ion homeostasis	cellular iron ion homeostasis	response to stress	cell communication	transcription factor binding	cellular response to starvation	response to pH	response to external stimulus	response to abiotic stimulus	regulation of biosynthetic process	response to extracellular stimulus	cellular response to iron ion starvation	response to alkalinity	regulation of gene expression	regulation of macromolecule biosynthetic process	transcription activator activity	CCAAT-binding factor complex	regulation of nucleobase, nucleoside, nucleotide and nucleic acid metabolic process	cellular homeostasis	cellular cation homeostasis	cellular di-, tri-valent inorganic cation homeostasis	transcription regulator activity	regulation of cellular biosynthetic process	response to nutrient levels	cellular response to extracellular stimulus	cellular response to nutrient levels	iron assimilation	regulation of transcription from RNA polymerase II promoter in response to iron ion starvation	cellular response to stress	homeostatic process	response to starvation	regulation of transcription from RNA polymerase II promoter in response to stress
NA	orf19.13026	orf19.13026	CAL0006254	TEL1	0	0	0	1	0	0	1	telomere maintenance	nucleic acid binding	DNA binding	protein kinase activity	mitochondrion	DNA metabolic process	DNA repair	double-strand break repair	chromatin organization	protein modification process	protein amino acid phosphorylation	phosphorus metabolic process	phosphate metabolic process	response to stress	response to DNA damage stimulus	DNA damage induced protein phosphorylation	kinase activity	phosphorylation	chromatin modification	covalent chromatin modification	histone modification	histone phosphorylation	transferase activity	transferase activity, transferring phosphorus-containing groups	phosphotransferase activity, alcohol group as acceptor	telomere organization	cellular response to stress	telomeric DNA binding	homeostatic process	macromolecule modification	sequence-specific DNA binding	post-translational protein modification	chromosome organization	cellular response to stimulus	anatomical structure homeostasis	regulation of biological quality
PIB1	orf19.7547	PIB1	CAL0000058	PIB1	0	0	0	1	0	0	1	fungal-type vacuole membrane	ubiquitin-protein ligase activity	phospholipid binding	endosome	late endosome	vacuolar membrane	protein modification process	lipid binding	protein ubiquitination	ligase activity	ligase activity, forming carbon-nitrogen bonds	acid-amino acid ligase activity	small conjugating protein ligase activity	organelle membrane	phosphatidylinositol-3-phosphate binding	protein modification by small protein conjugation	phosphoinositide binding	macromolecule modification	post-translational protein modification	vacuolar part	protein modification by small protein conjugation or removal
HAL9	orf19.10701	HAL9	CAL0002440	HAL9	0	0	0	1	0	0	1	nucleic acid binding	DNA binding	RNA polymerase II transcription factor activity	specific RNA polymerase II transcription factor activity	mitochondrion	transcription initiation	transcription initiation from RNA polymerase II promoter	protein complex assembly	response to stress	response to osmotic stress	response to abiotic stimulus	response to salt stress	cellular component assembly	transcription regulator activity	sequence-specific DNA binding	macromolecular complex subunit organization	macromolecular complex assembly
TAC1	orf19.3188	TAC1	CAL0002426	HAL9	0	0	0	1	0	0	1	nucleic acid binding	DNA binding	transcription factor activity	RNA polymerase II transcription factor activity	RNA polymerase II transcription factor activity, enhancer binding	transcription factor complex	regulation of transcription, DNA-dependent	regulation of transcription from RNA polymerase II promoter	response to endogenous stimulus	response to hormone stimulus	regulation of biosynthetic process	response to organic substance	regulation of gene expression	regulation of macromolecule biosynthetic process	transcription activator activity	regulation of nucleobase, nucleoside, nucleotide and nucleic acid metabolic process	transcription regulator activity	regulation of cellular biosynthetic process	enhancer binding	response to chemical stimulus	response to drug	sequence-specific DNA binding	nucleoplasm part	regulation of transcription	response to steroid hormone stimulus	regulation of nitrogen compound metabolic process	regulation of RNA metabolic process	regulation of macromolecule metabolic process	regulation of primary metabolic process
FLC2	orf19.1813	FLC2	CAL0001600	FLC2	0	0	0	1	0	0	1	transporter activity	endoplasmic reticulum	protein folding	nucleotide transport	fungal-type cell wall biogenesis	FAD transmembrane transporter activity	FAD transport	heme transport	nucleobase, nucleoside, nucleotide and nucleic acid transport	transmembrane transporter activity	substrate-specific transmembrane transporter activity	substrate-specific transporter activity	cell wall biogenesis	cellular component biogenesis	cofactor transport	cofactor transporter activity	transmembrane transport	cellular cell wall organization or biogenesis	cell wall organization or biogenesis
RPH2	orf19.10244	RPH2	CAL0004209	RPH1	0	0	0	1	0	0	1
EAF3	orf19.2660	EAF3	CAL0003490	EAF3	0	0	0	1	0	0	1	histone deacetylase complex	histone acetyltransferase complex	histone acetyltransferase activity	lysine N-acetyltransferase activity	DNA metabolic process	regulation of DNA replication	DNA repair	chromatin organization	RNA elongation	regulation of transcription, DNA-dependent	regulation of transcription from RNA polymerase II promoter	RNA elongation from RNA polymerase II promoter	protein modification process	protein amino acid acetylation	protein amino acid deacetylation	response to stress	response to DNA damage stimulus	N-acetyltransferase activity	acyltransferase activity	regulation of biosynthetic process	negative regulation of biosynthetic process	negative regulation of metabolic process	regulation of gene expression	regulation of macromolecule biosynthetic process	negative regulation of macromolecule biosynthetic process	negative regulation of macromolecule metabolic process	negative regulation of gene expression	acetyltransferase activity	N-acyltransferase activity	negative regulation of transcription	chromatin modification	covalent chromatin modification	histone modification	histone acetylation	histone deacetylation	chromatin remodeling complex	transferase activity	transferase activity, transferring acyl groups
NA	orf19.4214	orf19.4214	CAL0000098	NA	0	0	0	1	0	0	1
LIP6	orf19.4823	LIP6	CAL0005333	NA	0	0	0	1	0	0	1	extracellular region	lipid metabolic process	catabolic process	lipid catabolic process	lipase activity	hydrolase activity	hydrolase activity, acting on ester bonds
ARR3	orf19.3122	ARR3	CAL0002260	ARR3	0	0	0	1	0	0	1	transporter activity	ion transport	anion transport	anion transmembrane transporter activity	ion transmembrane transporter activity	inorganic anion transmembrane transporter activity	arsenite transmembrane transporter activity	inorganic anion transport	arsenite transport	transmembrane transporter activity	substrate-specific transmembrane transporter activity	substrate-specific transporter activity
DAL7	orf19.5023	DAL7	CAL0001617	DAL5	0	0	0	1	0	0	1	transporter activity	ion transport	anion transport	cation transmembrane transporter activity	anion transmembrane transporter activity	ion transmembrane transporter activity	secondary active transmembrane transporter activity	symporter activity	solute:cation symporter activity	anion:cation symporter activity	active transmembrane transporter activity	transmembrane transporter activity	substrate-specific transmembrane transporter activity	substrate-specific transporter activity
NA	orf19.411	orf19.411	CAL0005571	LEO1	0	0	0	1	0	0	1
NA	orf19.4347	orf19.4347	CAL0001018	PRR1	0	0	0	1	0	0	1	negative regulation of transcription from RNA polymerase II promoter	protein kinase activity	protein serine/threonine kinase activity	receptor signaling protein serine/threonine kinase activity	signal transducer activity	receptor signaling protein activity	regulation of transcription, DNA-dependent	regulation of transcription from RNA polymerase II promoter	regulation of transcription by pheromones	regulation of biosynthetic process	negative regulation of biosynthetic process	negative regulation of metabolic process	response to organic substance	regulation of gene expression	regulation of gene-specific transcription from RNA polymerase II promoter	negative regulation of gene-specific transcription from RNA polymerase II promoter	regulation of macromolecule biosynthetic process	negative regulation of macromolecule biosynthetic process	negative regulation of macromolecule metabolic process	negative regulation of gene expression	kinase activity	negative regulation of transcription	transferase activity	transferase activity, transferring phosphorus-containing groups	phosphotransferase activity, alcohol group as acceptor	regulation of nucleobase, nucleoside, nucleotide and nucleic acid metabolic process	response to pheromone	negative regulation of conjugation	regulation of conjugation with cellular fusion	negative regulation of conjugation with cellular fusion	negative regulation of cellular metabolic process	regulation of cellular biosynthetic process	negative regulation of cellular biosynthetic process	negative regulation of gene-specific transcription	regulation of gene-specific transcription	response to chemical stimulus	regulation of multi-organism process	negative regulation of multi-organism process
KIN3	orf19.5325	KIN3	CAL0004280	KIN3	0	0	0	1	0	0	1	chromosome segregation
LEU3	orf19.11700	LEU3	CAL0000141	LEU3	0	0	0	1	0	0	1	nucleic acid binding	DNA binding	RNA polymerase II transcription factor activity	specific RNA polymerase II transcription factor activity	organic acid metabolic process	regulation of transcription, DNA-dependent	regulation of transcription from RNA polymerase II promoter	cellular amino acid and derivative metabolic process	cellular amino acid metabolic process	leucine metabolic process	cellular amino acid biosynthetic process	branched chain family amino acid metabolic process	branched chain family amino acid biosynthetic process	leucine biosynthetic process	amine metabolic process	amine biosynthetic process	regulation of biosynthetic process	regulation of gene expression	regulation of macromolecule biosynthetic process	organic acid biosynthetic process	regulation of nucleobase, nucleoside, nucleotide and nucleic acid metabolic process	carboxylic acid metabolic process	transcription regulator activity	regulation of cellular biosynthetic process	cellular ketone metabolic process	oxoacid metabolic process	sequence-specific DNA binding	cellular amine metabolic process	cellular nitrogen compound biosynthetic process	small molecule biosynthetic process	regulation of transcription	carboxylic acid biosynthetic process	regulation of nitrogen compound metabolic process	regulation of RNA metabolic process	regulation of macromolecule metabolic process	regulation of primary metabolic process
RIM11	orf19.1593	RIM11	CAL0002017	NA	0	0	0	1	0	0	1	reproduction	reproductive developmental process	protein kinase activity	protein serine/threonine kinase activity	protein modification process	protein amino acid phosphorylation	proteolysis	phosphorus metabolic process	phosphate metabolic process	response to stress	kinase activity	phosphorylation	transferase activity	transferase activity, transferring phosphorus-containing groups	phosphotransferase activity, alcohol group as acceptor	sexual reproduction	reproductive process in single-celled organism	reproductive process	cell differentiation	sporulation resulting in formation of a cellular spore	ascospore formation	developmental process	sexual sporulation	macromolecule modification	post-translational protein modification	sporulation	sexual sporulation resulting in formation of a cellular spore	cell development	reproductive cellular process	anatomical structure formation involved in morphogenesis	anatomical structure development	cellular developmental process
PRM9	orf19.2508	PRM9	CAL0002367	PRM9	0	0	0	1	0	0	1
SLK19	orf19.6763	SLK19	CAL0004917	SLK19	0	0	0	1	0	0	1	integral to plasma membrane	cellular cell wall organization	response to pH	pathogenesis	response to abiotic stimulus	integral to membrane	intrinsic to membrane	intrinsic to plasma membrane	fungal-type cell wall organization	membrane part	plasma membrane part	external encapsulating structure organization	multi-organism process	cellular cell wall organization or biogenesis	cell wall organization or biogenesis	cell wall organization
EAP1	orf19.1401	EAP1	CAL0004450	MUC1	0	0	0	1	0	0	1	protein binding	cell wall	cell adhesion	fungal-type cell wall	cell surface	cell-cell adhesion	biological adhesion	external encapsulating structure	intrinsic to membrane	anchored to membrane	intrinsic to plasma membrane	biofilm formation	adhesion to host	interspecies interaction between organisms	membrane part	plasma membrane part	anchored to plasma membrane	cell adhesion molecule binding	interaction with host	multi-organism process	adhesion to other organism involved in symbiotic interaction
NA	orf19.2225	orf19.2225	CAL0003658	NA	0	0	0	1	0	0	1	protein polyubiquitination	DNA metabolic process	DNA repair	postreplication repair	protein complex assembly	protein modification process	response to stress	response to DNA damage stimulus	free ubiquitin chain polymerization	protein ubiquitination	cellular component assembly	ubiquitin conjugating enzyme complex	protein modification by small protein conjugation	cellular response to stress	cellular macromolecular complex subunit organization	cellular macromolecular complex assembly	macromolecule modification	cellular protein complex assembly	post-translational protein modification	macromolecular complex subunit organization	protein polymerization	cellular response to stimulus	macromolecular complex assembly	protein modification by small protein conjugation or removal
UBC15	orf19.5337	UBC15	CAL0004297	UBC13	0	0	0	1	0	0	1
NA	orf19.6358	orf19.6358	CAL0001347	MMS2	0	0	0	1	0	0	1	protein polyubiquitination	DNA metabolic process	DNA repair	postreplication repair	protein complex assembly	protein modification process	response to stress	response to DNA damage stimulus	free ubiquitin chain polymerization	protein ubiquitination	cellular component assembly	ubiquitin conjugating enzyme complex	protein modification by small protein conjugation	cellular response to stress	cellular macromolecular complex subunit organization	cellular macromolecular complex assembly	macromolecule modification	cellular protein complex assembly	post-translational protein modification	macromolecular complex subunit organization	protein polymerization	cellular response to stimulus	macromolecular complex assembly	protein modification by small protein conjugation or removal
NA	orf19.13655	orf19.13655	CAL0000571	MUC1	0	0	0	1	0	0	1
ADR1	orf19.2752	ADR1	CAL0004236	ADR1	0	0	0	1	0	0	1	negative regulation of transcription from RNA polymerase II promoter	regulation of transcription from RNA polymerase II promoter by carbon catabolites	regulation of transcription from RNA polymerase II promoter by glucose	negative regulation of transcription from RNA polymerase II promoter by glucose	negative regulation of transcription from RNA polymerase II promoter by carbon catabolites	nucleic acid binding	DNA binding	transcription factor activity	transcription	regulation of transcription, DNA-dependent	regulation of transcription from RNA polymerase II promoter	cell communication	response to nutrient	macromolecule biosynthetic process	response to external stimulus	regulation of biosynthetic process	negative regulation of biosynthetic process	negative regulation of metabolic process	response to extracellular stimulus	regulation of gene expression	regulation of macromolecule biosynthetic process	negative regulation of macromolecule biosynthetic process	negative regulation of macromolecule metabolic process	negative regulation of gene expression	negative regulation of transcription	regulation of nucleobase, nucleoside, nucleotide and nucleic acid metabolic process	filamentous growth	transcription regulator activity	negative regulation of cellular metabolic process	regulation of cellular biosynthetic process	negative regulation of cellular biosynthetic process	response to nutrient levels	cellular response to extracellular stimulus	cellular response to nutrient levels	cellular response to nutrient	cellular macromolecule biosynthetic process	growth	response to chemical stimulus
PHO23	orf19.1759	PHO23	CAL0000874	PHO23	0	0	0	1	0	0	1	histone deacetylase complex	protein binding	chromatin organization	regulation of transcription, DNA-dependent	regulation of transcription from RNA polymerase I promoter	regulation of transcription from RNA polymerase II promoter	protein modification process	protein amino acid deacetylation	regulation of biosynthetic process	negative regulation of biosynthetic process	positive regulation of biosynthetic process	negative regulation of metabolic process	positive regulation of metabolic process	regulation of gene expression	regulation of gene-specific transcription from RNA polymerase II promoter	positive regulation of gene-specific transcription from RNA polymerase II promoter	regulation of macromolecule biosynthetic process	positive regulation of macromolecule biosynthetic process	negative regulation of macromolecule biosynthetic process	positive regulation of macromolecule metabolic process	negative regulation of macromolecule metabolic process	positive regulation of gene expression	negative regulation of gene expression	negative regulation of transcription from RNA polymerase I promoter	negative regulation of transcription	chromatin modification	covalent chromatin modification	histone modification	histone deacetylation	chromatin remodeling complex	regulation of nucleobase, nucleoside, nucleotide and nucleic acid metabolic process	negative regulation of cellular metabolic process	positive regulation of cellular metabolic process	regulation of cellular biosynthetic process	negative regulation of cellular biosynthetic process	positive regulation of cellular biosynthetic process	regulation of chromatin silencing	negative regulation of chromatin silencing
NA	orf19.1277	orf19.1277	CAL0003022	MUC1	0	0	0	1	0	0	1
CIS1	orf19.13474	CIS1	CAL0005144	ECM38	0	0	0	1	0	0	1	storage vacuole	lytic vacuole	fungal-type vacuole	gamma-glutamyltransferase activity	vacuole	peptide metabolic process	cellular amino acid and derivative metabolic process	cellular amino acid derivative metabolic process	coenzyme metabolic process	glutathione metabolic process	glutathione catabolic process	sulfur metabolic process	catabolic process	coenzyme catabolic process	transferase activity	transferase activity, transferring acyl groups	transferase activity, transferring amino-acyl groups	cellular amino acid derivative catabolic process	xenobiotic transport	peptide catabolic process	cellular catabolic process	sulfur compound catabolic process	small molecule catabolic process	cofactor metabolic process	cofactor catabolic process
IRS4	orf19.14215	IRS4	CAL0000299	TAX4	0	0	0	1	0	0	1	cellular cell wall organization	pathogenesis	biological adhesion	filamentous growth	hyphal growth	fungal-type cell wall organization	growth	adhesion to host	interspecies interaction between organisms	external encapsulating structure organization	interaction with host	multi-organism process	adhesion to other organism involved in symbiotic interaction	cellular cell wall organization or biogenesis	cell wall organization or biogenesis	cell wall organization
CCW14	orf19.1969	CCW14	CAL0002640	CCW14	0	0	0	1	0	0	1	cell wall	response to stress	fungal-type cell wall	external encapsulating structure
NA	orf19.2476	orf19.2476	CAL0001611	ECM5	0	0	0	1	0	0	1	histone deacetylase complex	chromatin	nuclear chromatin	cellular cell wall organization	chromatin remodeling complex	fungal-type cell wall organization	chromosomal part	nucleoplasm part	nuclear chromosome part	external encapsulating structure organization	Snt2C complex	cellular cell wall organization or biogenesis	cell wall organization or biogenesis	cell wall organization
NA	orf19.251	orf19.251	CAL0004002	HSP31	0	0	0	1	0	0	1	cell fraction	cell wall	soluble fraction	fungal-type cell wall	external encapsulating structure	hyphal cell wall
HWP2	orf19.3380	HWP2	CAL0004200	MUC1	0	0	0	1	0	0	1	cell wall	fungal-type cell wall	pathogenesis	cell surface	external encapsulating structure	filamentous growth	growth	multi-organism process
HYR1	orf19.4975	HYR1	CAL0006398	MUC1	0	0	0	1	0	0	1	extracellular region	cell wall	fungal-type cell wall	response to biotic stimulus	cell surface	external encapsulating structure	intrinsic to membrane	anchored to membrane	intrinsic to plasma membrane	avoidance of host defenses	interspecies interaction between organisms	membrane part	plasma membrane part	anchored to plasma membrane	interaction with host	multi-organism process	response to other organism	avoidance of defenses of other organism involved in symbiotic interaction	response to defenses of other organism involved in symbiotic interaction	response to host defenses	response to host
PHR3	orf19.5632	PHR3	CAL0004897	GAS4	0	0	0	1	0	0	1	cell wall	cellular cell wall organization	fungal-type cell wall	transferase activity	reproductive process	cellular component assembly	external encapsulating structure	ascospore wall assembly	glucanosyltransferase activity	1,3-beta-glucanosyltransferase activity	spore wall assembly	external encapsulating structure organization	reproductive cellular process	cell wall assembly	cellular cell wall organization or biogenesis	cell wall organization or biogenesis	cell wall organization
SPR1	orf19.2237	SPR1	CAL0006247	SPR1	0	0	0	1	0	0	1	cell surface
NA	orf19.2296	orf19.2296	CAL0006415	HPF1	0	0	0	1	0	0	1
NA	orf19.2336	orf19.2336	CAL0000726	PRY3	0	0	0	1	0	0	1
ECM14	orf19.299	ECM14	CAL0004123	ECM14	0	0	0	1	0	0	1	storage vacuole	lytic vacuole	fungal-type vacuole	vacuole	cellular cell wall organization	fungal-type cell wall organization	external encapsulating structure organization	cellular cell wall organization or biogenesis	cell wall organization or biogenesis	cell wall organization
BEM2	orf19.6573	BEM2	CAL0003273	BEM2	0	0	0	1	0	0	1	incipient cellular bud site	microtubule cytoskeleton organization	small GTPase regulator activity	GTPase activator activity	Ras GTPase activator activity	Rho GTPase activator activity	mitochondrion	plasma membrane	cellular bud tip	cell cortex	cytoskeleton organization	microtubule-based process	enzyme activator activity	regulation of signal transduction	negative regulation of signal transduction	regulation of cell communication	negative regulation of cell communication	regulation of signaling process	negative regulation of signaling process	actin filament-based process	actin cytoskeleton organization	enzyme regulator activity	site of polarized growth	GTPase regulator activity	regulation of Rho protein signal transduction	negative regulation of Rho protein signal transduction	regulation of signaling pathway	negative regulation of signaling pathway	mating projection tip	cell projection part	regulation of Ras protein signal transduction	negative regulation of Ras protein signal transduction	negative regulation of biological process	negative regulation of cellular process	regulation of small GTPase mediated signal transduction	negative regulation of small GTPase mediated signal transduction	nucleoside-triphosphatase regulator activity
CAP1	orf19.9191	CAP1	CAL0006368	CAD1	0	0	0	1	0	0	1	nucleic acid binding	DNA binding	transcription factor activity	RNA polymerase II transcription factor activity	regulation of transcription, DNA-dependent	regulation of transcription from RNA polymerase II promoter	response to stress	defense response	response to oxidative stress	response to biotic stimulus	regulation of biosynthetic process	positive regulation of biosynthetic process	positive regulation of metabolic process	response to inorganic substance	response to metal ion	regulation of gene expression	regulation of macromolecule biosynthetic process	positive regulation of macromolecule biosynthetic process	positive regulation of macromolecule metabolic process	positive regulation of gene expression	regulation of nucleobase, nucleoside, nucleotide and nucleic acid metabolic process	evasion or tolerance of host immune response	transcription regulator activity	evasion or tolerance of host defense response	positive regulation of cellular metabolic process	regulation of cellular biosynthetic process	positive regulation of cellular biosynthetic process	cellular response to stress	cellular response to oxidative stress	response to chemical stimulus	response to drug	regulation of transcription from RNA polymerase II promoter in response to stress	regulation of transcription from RNA polymerase II promoter in response to oxidative stress	regulation of transcription in response to stress	avoidance of host defenses	evasion or tolerance of host defenses	interspecies interaction between organisms	regulation of transcription
SIP5	orf19.2458	SIP5	CAL0001563	SIP5	0	0	0	1	0	0	1	nucleic acid binding	DNA binding	transcription factor activity	regulation of transcription, DNA-dependent	response to stress	cell communication	cellular response to starvation	response to external stimulus	regulation of biosynthetic process	response to extracellular stimulus	regulation of gene expression	regulation of macromolecule biosynthetic process	regulation of nucleobase, nucleoside, nucleotide and nucleic acid metabolic process	transcription regulator activity	regulation of cellular biosynthetic process	response to nutrient levels	cellular response to extracellular stimulus	cellular response to nutrient levels	cellular response to stress	cellular response to glucose starvation	response to starvation	regulation of transcription	regulation of nitrogen compound metabolic process	regulation of RNA metabolic process	cellular response to stimulus	regulation of macromolecule metabolic process	cellular response to external stimulus	regulation of primary metabolic process
NA	orf19.3088	orf19.3088	CAL0001507	NA	0	0	0	1	0	0	1	nucleic acid binding	DNA binding	transcription factor activity	regulation of transcription, DNA-dependent	regulation of biosynthetic process	regulation of gene expression	regulation of macromolecule biosynthetic process	regulation of nucleobase, nucleoside, nucleotide and nucleic acid metabolic process	transcription regulator activity	regulation of cellular biosynthetic process	regulation of transcription	regulation of nitrogen compound metabolic process	regulation of RNA metabolic process	regulation of macromolecule metabolic process	regulation of primary metabolic process
NA	orf19.2612	orf19.2612	CAL0003377	SWI5	0	0	0	1	0	0	1	nucleic acid binding	DNA binding	transcription factor activity	regulation of transcription, DNA-dependent	regulation of biosynthetic process	regulation of gene expression	regulation of macromolecule biosynthetic process	regulation of nucleobase, nucleoside, nucleotide and nucleic acid metabolic process	transcription regulator activity	regulation of cellular biosynthetic process	regulation of transcription	regulation of nitrogen compound metabolic process	regulation of RNA metabolic process	regulation of macromolecule metabolic process	regulation of primary metabolic process
NA	orf19.1496	orf19.1496	CAL0004781	NA	0	0	0	1	0	0	1	nucleic acid binding	DNA binding	transcription factor activity	regulation of transcription, DNA-dependent	regulation of biosynthetic process	regulation of gene expression	regulation of macromolecule biosynthetic process	regulation of nucleobase, nucleoside, nucleotide and nucleic acid metabolic process	transcription regulator activity	regulation of cellular biosynthetic process	regulation of transcription	regulation of nitrogen compound metabolic process	regulation of RNA metabolic process	regulation of macromolecule metabolic process	regulation of primary metabolic process
MCM1	orf19.7025	MCM1	CAL0001975	MCM1	0	0	0	1	0	0	1	chromatin	nuclear chromatin	nucleic acid binding	DNA binding	transcription factor activity	regulation of transcription, DNA-dependent	regulation of transcription from RNA polymerase II promoter	regulation of biosynthetic process	regulation of gene expression	regulation of macromolecule biosynthetic process	regulation of nucleobase, nucleoside, nucleotide and nucleic acid metabolic process	filamentous growth	hyphal growth	transcription regulator activity	regulation of cellular biosynthetic process	growth	chromosomal part	nuclear chromosome part	regulation of transcription	regulation of nitrogen compound metabolic process	regulation of RNA metabolic process	regulation of macromolecule metabolic process	regulation of primary metabolic process
SNT2	orf19.1259	SNT2	CAL0002960	SNT2	0	0	0	1	0	0	1	histone deacetylase complex	chromatin	nuclear chromatin	nucleic acid binding	DNA binding	chromatin remodeling complex	chromosomal part	nucleoplasm part	nuclear chromosome part	Snt2C complex
NA	orf19.1219	orf19.1219	CAL0002798	RKR1	0	0	0	1	0	0	1
IFK2	orf19.856	IFK2	CAL0002780	NA	0	0	0	1	0	0	1
ALS7	orf19.7400	ALS7	CAL0005421	SAG1	0	0	0	1	0	0	1	cell wall	cell adhesion	fungal-type cell wall	cell surface	biological adhesion	external encapsulating structure	cell adhesion involved in biofilm formation	cell adhesion involved in single-species biofilm formation	cell adhesion involved in multi-species biofilm formation
HSM3	orf19.1331	HSM3	CAL0003786	HSM3	0	0	0	1	0	0	1	cytosol	DNA metabolic process	DNA repair	mismatch repair	protein complex assembly	response to stress	response to DNA damage stimulus	cellular component assembly	cellular response to stress	cellular macromolecular complex subunit organization	cellular macromolecular complex assembly	proteasome assembly	cellular protein complex assembly	macromolecular complex subunit organization	cellular response to stimulus	macromolecular complex assembly	proteasome regulatory particle assembly
GAP1	orf19.4304	GAP1	CAL0000889	GAP1	0	0	0	1	0	0	1	cell wall	amino acid transport	fungal-type cell wall	cell surface	amine transport	organic acid transport	integral to membrane	external encapsulating structure	filamentous growth	intrinsic to membrane	growth	membrane part	carboxylic acid transport
PRR2	orf19.1341	PRR2	CAL0003821	PRR2	0	0	0	1	0	0	1	response to chemical stimulus	response to drug
VPS34	orf19.6243	VPS34	CAL0000495	VPS34	0	0	0	0	0	1	1	nuclear division	fungal-type vacuole membrane	pre-autophagosomal structure	lipid kinase activity	inositol or phosphatidylinositol kinase activity	protein kinase activity	endosome	vacuolar membrane	phosphoinositide 3-kinase complex	protein modification process	protein amino acid phosphorylation	vacuolar protein processing	lipid metabolic process	phospholipid metabolic process	glycerophospholipid metabolic process	phosphorus metabolic process	phosphate metabolic process	endocytosis	autophagy	response to stress	response to osmotic stress	microtubule-based process	microtubule-based movement	vacuole organization	vacuolar transport	nuclear migration	catabolic process	pathogenesis	response to abiotic stimulus	membrane invagination	microtubule-based transport	cellular membrane organization	vesicle-mediated transport	kinase activity	1-phosphatidylinositol-3-kinase activity	phosphorylation	protein processing	transferase activity
HIT1	orf19.2723	HIT1	CAL0004198	HIT1	0	0	0	0	0	1	1
VTI1	orf19.337	VTI1	CAL0004755	VTI1	0	0	0	0	0	1	1	intra-Golgi vesicle-mediated transport	post-Golgi vesicle-mediated transport	Golgi to vacuole transport	vacuolar transport	integral to membrane	vesicle-mediated transport	integral to Golgi membrane	SNARE complex	intrinsic to membrane	intrinsic to Golgi membrane	intrinsic to organelle membrane	integral to organelle membrane	membrane part	Golgi apparatus part	intracellular transport	Golgi vesicle transport	establishment of localization in cell
FRQ1	orf19.12189	FRQ1	CAL0004401	FRQ1	0	0	0	0	0	1	1	Golgi membrane	enzyme activator activity	regulation of signal transduction	regulation of cell communication	regulation of signaling process	enzyme regulator activity	organelle membrane	Golgi apparatus part
TAF11	orf19.14185	TAF11	CAL0000201	TAF11	0	0	0	0	0	1	1
[truncated: 95 more columns]
